# Supplementary material for: A binary catalyst system of a cationic Ru–CNC pincer complex with an alkali metal salt for selective hydroboration of carbon dioxide
Source: Royal Society of Chemistry journal article supplement (doi:10.1039/c6cc06278d), 2016-01-01
Supplement: c6cc06278d1.pdf [file c6cc06278d1.pdf]

## SUPPORTING INFORMATION

### **Binary Catalyst System of Cationic Ru-CNC Pincer Complex with an Alkali Metal Salt for Selective Hydroboration of Carbon Dioxide**

Chee Koon Ng<sup>[a,b]</sup>, Jie Wu<sup>\*[c]</sup>, T.S. Andy Hor<sup>\*[a,b]</sup>, He-Kuan Luo<sup>\*[b]</sup>

[a] NUS Graduate School for Integrative Sciences and Engineering, Center for Life Sciences, #05-01, 28 Medical Drive Singapore 117456, Singapore

[b] Institute of Materials Research and Engineering, Agency for Science, Technology and Research, #08-03, 2 Fusionopolis Way, Innovis, Singapore 138634, Singapore

[c] Department of Chemistry, National University of Singapore, 3 Science Drive 3, Singapore 117543, Singapore

Corresponding authors:      He-Kuan Luo      ([luoh@imre.a-star.edu.sg](mailto:luoh@imre.a-star.edu.sg))  
                                         T.S. Andy Hor      ([andyhor@hku.hk](mailto:andyhor@hku.hk))  
                                         Jie Wu      ([chmjie@nus.edu.sg](mailto:chmjie@nus.edu.sg))

**12<sup>th</sup> December 2016**

**Note added after first publication:** This Supplementary Information file replaces that originally published on 15<sup>th</sup> September 2016, in which inaccurate crystal structure data were presented.

## Contents

|                                                                                                                    |     |
|--------------------------------------------------------------------------------------------------------------------|-----|
| S1. General considerations .....                                                                                   | S3  |
| S2. Synthetic procedures and characterization details .....                                                        | S4  |
| S3. Selected crystal data, data collection, and refinement parameters for complex <b>12</b> and <b>14</b><br>..... | S9  |
| S4. Hydroboration procedures .....                                                                                 | S11 |
| S5. <sup>1</sup> H NMR and ESI-MS of reactions .....                                                               | S12 |
| S6. NMR spectra of synthesized compounds .....                                                                     | S22 |
| References: .....                                                                                                  | S40 |

|  |
|--|
|  |
|--|

## S1. General considerations

All preparations and manipulations were performed using standard Schlenk techniques under a nitrogen atmosphere unless specified. Solvents were dried using a MBraun SPS column. Chemicals were purchased from commercial suppliers and used as received without further purification. CD<sub>2</sub>Cl<sub>2</sub> was purchased from Cambridge Isotopes and stored under N<sub>2</sub> and 3 Å molecular sieves.

Ligands **1**, **2**, **3** and silver complexes<sup>1b,2</sup> **4**, **5** and **6** were synthesized according to literature procedures. Complex **10** was prepared according to modified literature using dichloromethane as solvent under room temperature for 24h<sup>3</sup>. [Ru(CO)<sub>2</sub>Cl<sub>2</sub>]<sub>n</sub><sup>4</sup> and RuHCl(CO)(PPh<sub>3</sub>)<sub>3</sub><sup>5</sup> were also prepared via literature procedures. NMR spectra were measured at 25°C using a Bruker ACF 500 MHz and JEOL Resonance 500MHz NMR spectrometer. Chemical shifts are expressed with a positive sign, in parts per million, relative to residual <sup>1</sup>H and <sup>13</sup>C solvent signals, and external BF<sub>3</sub>.OEt<sub>2</sub> for <sup>11</sup>B NMR. Data are reported as follows: chemical shift, multiplicity (s = singlet, d = doublet, t = triplet, q = quartet, m = multiplet, br = broad), coupling constants (Hz) and integration.

Flash column chromatography was generally performed using Silica Gel. Elemental analyses were performed on a VarioMICRO Elementar system. IR spectra were recorded using a Varian 3100 FT-IR spectrometer using KBr pellets. ESI-MS measurements were performed on Finnigan LCQ mass spectrometer, isotope distribution patterns were used as a composition proof in addition to m/z signal. Diffraction measurements were conducted at 100(2) K on a Bruker AXS D8 Venture diffractometer by using Mo-K $\alpha$  radiation ( $\lambda = 0.71073$  Å). The data were corrected for absorption effects using the multi-scan method implemented in the program SADABS.<sup>6</sup> Structure solutions and refinements were performed by using the programs SHELXT<sup>7</sup>, SHELXL-version 2014/6<sup>8</sup> and SHELXL-2014/7.<sup>9</sup> For complex **12**, the atomic position of the hydride coordinated to the ruthenium was calculated with the aid of the program XHydex.<sup>10</sup> The method employed was a potential energy minimization, the search for a terminal H-atom on Ru1 was attempted on a hole location with a radius of 3.00 Å and a Metal-H bond length of 1.600(0.050) Å. The U[iso] of the hydride H1 and fractional coordinates were fixed. CCDC No.: 1479629 (complex **12**), 1479630 (complex **14**)

## S2. Synthetic procedures and characterization details

### Complex 7

In the dark, a mixture of silver complex **4** (0.582 g, 1.05 mmol) and  $[\text{Ru}(\text{CO})_2\text{Cl}_2]_n$  (0.228 g, 1.00 mmol) in  $\text{CH}_3\text{OH}$  (40 mL) was heated under reflux for 24 h. After cooling to room temperature, the solution was filtered through Celite.  $\text{NH}_4\text{PF}_6$  (0.408 g, 2.50 mmol, 5 equiv.) was added and stirred at room temperature for 2 h.

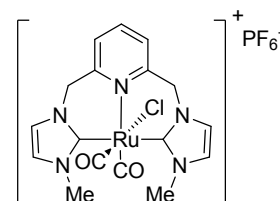

The resultant solution was evaporated and extracted with  $\text{CH}_3\text{CN}$  ( $4 \times 10$  mL). The solvent was removed under vacuum and the crude residue was purified by column chromatography ( $\text{CH}_2\text{Cl}_2 : \text{CH}_3\text{CN}$ , 10:1). The complex was subsequently dissolved in some  $\text{CH}_3\text{CN}$  and triturated with  $\text{Et}_2\text{O}$  to afford complex **7** as a pale yellow solid (0.162 g, 27%). A meaningful  $^{13}\text{C}\{^1\text{H}\}$  NMR spectrum for complex **7** could not be obtained due to low solubility of the product in common organic solvents and significant line broadening.

$^1\text{H}$  NMR (500MHz,  $\text{DMSO}-d_6$ ):  $\delta$  8.27 (t,  $J = 7.7$  Hz, 1H, py-H4), 7.88 (d,  $J = 7.2$  Hz, 2H, 2 py-H3), 7.70 (s, 2H, 2 imi-H3), 7.61 (s, 2H, 2 imi-H4), 6.38 (br s, 1H, py-CHH), 5.93 (br s, 1H, py-CHH), 5.63 (br s, 1H, py-CHH), 5.21 (br s, 1H, py-CHH), 3.98 (s, 6H, 2  $\text{NCH}_3$ ).

IR (KBr):  $\nu(\text{CO})$  2053, 1989  $\text{cm}^{-1}$

MS [ESI]:  $m/z$  (%) = 459.94  $[\text{Ru}(\text{CNC}_{\text{Me}})(\text{CO})_2(\text{Cl})]^+$  (75), 431.96  $[\text{Ru}(\text{CNC}_{\text{Me}})(\text{CO})(\text{Cl})]^+$  (15), 404.11  $[\text{Ru}(\text{CNC}_{\text{Me}})(\text{Cl})]^+$  (100).

EA: Calcd.  $\text{C}_{17}\text{H}_{19}\text{ClF}_6\text{N}_3\text{O}_2\text{PRu} \cdot 0.25\text{Et}_2\text{O}$ : C 34.57, H 3.47, N 11.20%. Found: C 34.68, H 3.38, N 11.28%.

### Complex 8

In the dark, a mixture of silver complex **5** (0.741 g, 1.05 mmol) and  $[\text{Ru}(\text{CO})_2\text{Cl}_2]_n$  (0.228 g, 1.00 mmol) in dry  $\text{CH}_3\text{CN}$  (40 mL) was heated under reflux for 2 h. After cooling to room temperature, the solution was filtered through Celite and evaporated.  $\text{NH}_4\text{PF}_6$  (0.408 g, 2.50 mmol, 5 equiv.) and  $\text{CH}_3\text{OH}$  (20 mL) was added and stirred at room temperature for 2 h. The resultant solution was evaporated and extracted with  $\text{CH}_3\text{CN}$  ( $4 \times 5$  mL). The solvent was removed under vacuum and the crude residue was purified by column chromatography ( $\text{CH}_2\text{Cl}_2 : \text{CH}_3\text{CN}$ , 10:1). The complex was subsequently dissolved in some  $\text{CH}_3\text{CN}$  and triturated with  $\text{Et}_2\text{O}$  to afford complex **8** as a pale yellow solid (0.502 g, 66%).

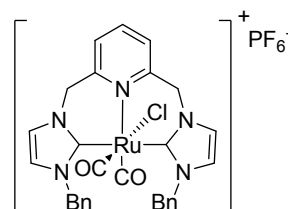

$^1\text{H}$  NMR (500MHz,  $\text{DMSO}-d_6$ ):  $\delta$  8.30 (t,  $J = 7.7$  Hz, 1H, py-H4), 7.93 (br d,  $J = 10.2$  Hz, 2H, 2 py-H3), 7.79 (s, 1H, imi-H3), 7.78 (s, 1H, imi-H3), 7.39 – 7.29 (m, 8H, 2 imi-H4 + 6 Ar-H), 7.21 – 7.17 (m, 4H, 4 Ar-H), 6.57 (d,  $J = 13.7$  Hz, 1H, py-CHH), 5.98 (d,  $J = 16.1$  Hz, 1H, py-CHH), 5.75 – 5.43 (m, 5H, py-CHH + 2  $\text{NCH}_2$ ), 5.33 (d,  $J = 15.9$  Hz, 1H, py-CHH).

$^{13}\text{C}\{^1\text{H}\}$  NMR (125 MHz,  $\text{DMSO}-d_6$ ):  $\delta$  197.30 (s, CO), 192.10 (s, CO), 172.52 (s, Ru-C), 170.20 (s, Ru-C), 156.36 (s, py C2), 155.94 (s, py C2), 141.86 (s, py C4), 136.66 (s, Ar C1), 136.29 (s, Ar C1), 128.75 (s, 4 Ar C3), 127.96 (s, 2 Ar C2), 127.81 (s, 2 Ar C2), 127.41 (s, 2 Ar C4), 126.90 (s, py C3), 126.78 (s, py C3), 126.70 (s, imi-C4), 124.53 (s, imi-C4), 123.49 (s, imi-C3), 123.30 (s, imi-C3), 55.55 (s, py- $\text{CH}_2$ ), 53.57 (s, py- $\text{CH}_2$ ), 53.09 (s,  $\text{NCH}_2$ ), 52.45 (s,  $\text{NCH}_2$ ).

IR (KBr):  $\nu(\text{CO})$  2057, 1989  $\text{cm}^{-1}$

MS [ESI]:  $m/z$  (%) = 612.03  $[\text{Ru}(\text{CNC}_{\text{Bn}})(\text{CO})_2(\text{Cl})]^+$  (100), 556.04  $[\text{Ru}(\text{CNC}_{\text{Bn}})(\text{Cl})]^+$  (25), 520.24  $[\text{Ru}(\text{CNC}_{\text{Bn}})]^+$  (45).

EA: Calcd.  $\text{C}_{29}\text{H}_{27}\text{ClF}_6\text{N}_5\text{O}_2\text{PRu}$ : C 45.89, H 3.59, N 9.23%. Found: C 46.25, H 3.49, N 9.41%.

### Complex 9

In the dark, a mixture of silver complex **6** (0.670 g, 1.05 mmol) and  $[\text{Ru}(\text{CO})_2\text{Cl}_2]_n$  (0.228 g, 1.00 mmol) in dichloroethane (40 mL) and  $\text{CH}_3\text{OH}$  (10 mL) was heated under reflux for 4 h. After cooling to room temperature, the solution was filtered through Celite and evaporated.  $\text{NH}_4\text{PF}_6$  (0.408 g, 2.50 mmol, 5 equiv.) and  $\text{CH}_3\text{OH}$  (20 mL) was added and stirred at room temperature for 2 h. The resultant solution was evaporated and extracted with  $\text{CH}_3\text{CN}$  ( $4 \times 5$  mL). The solvent was removed under vacuum and the crude residue was purified by column chromatography ( $\text{CH}_2\text{Cl}_2$  :  $\text{CH}_3\text{CN}$ , 10:1). The complex was subsequently dissolved in some  $\text{CH}_3\text{CN}$  and triturated with  $\text{Et}_2\text{O}$  to afford complex **9** as a pale yellow solid (0.394 g, 57%).

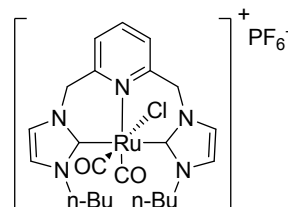

$^1\text{H}$  NMR (500MHz,  $\text{DMSO}-d_6$ ):  $\delta$  8.26 (t,  $J = 7.7$  Hz, 1H, py-H4), 7.87 (br d,  $J = 14.5$  Hz, 2H, 2 py-H3), 7.74 – 7.61 (m, 4H, 2 imi-H3 + 2 imi-H4), 6.46 (d,  $J = 15.6$  Hz, 1H, py-CHH), 5.89 (d,  $J = 16.4$  Hz, 1H, py-CHH), 5.63 (d,  $J = 13.8$  Hz, 1H, py-CHH), 5.21 (d,  $J = 15.8$  Hz, 1H, py-CHH), 4.48 (br-s, 1H, NCHH) 4.16 (m, 3H, 3 NCHH), 1.86 (br-s, 4H, 2  $\text{CH}_2$ ), 1.41 (br-s, 4H, 2  $\text{CH}_2$ ), 0.94 (t,  $J = 7.4$  Hz, 6H, 2  $\text{CH}_3$ ).

$^{13}\text{C}\{^1\text{H}\}$  NMR (125 MHz,  $\text{DMSO}-d_6$ ): 198.61 (s, CO), 192.46 (s, CO), 171.29 (s, Ru-C), 168.76 (s, Ru-C), 156.35 (s, py C2), 155.95 (s, py C2), 141.79 (s, py C4), 126.66 (s, py C3), 126.42 (s, py C3), 124.08 (s, imi-C4), 122.95 (s, imi-C4), 122.79 (s, imi-C3), 122.34 (s, imi-C3), 55.38 (s, py- $\text{CH}_2$ ), 53.41 (s, py- $\text{CH}_2$ ), 49.89 (s,  $\text{NCH}_2$ ), 49.27 (s,  $\text{NCH}_2$ ), 32.92 (s, 2  $\text{CH}_2$ ), 19.31 (s, 2  $\text{CH}_2$ ), 13.57 (s, 2  $\text{CH}_3$ ).

IR (KBr):  $\nu(\text{CO})$  2048, 1983  $\text{cm}^{-1}$

MS [ESI]:  $m/z$  (%) = 544.06  $[\text{Ru}(\text{CNC}_{n\text{-Bu}})(\text{CO})_2(\text{Cl})]^+$  (100), 516.02  $[\text{Ru}(\text{CNC}_{n\text{-Bu}})(\text{CO})(\text{Cl})]^+$  (15), 488.02  $[\text{Ru}(\text{CNC}_{n\text{-Bu}})(\text{Cl})]^+$  (45), 450.21  $[\text{Ru}(\text{CNC}_{n\text{-Bu}}) - 2\text{H}]^+$  (55).

EA: Calcd.  $\text{C}_{23}\text{H}_{31}\text{ClF}_6\text{N}_5\text{O}_2\text{PRu} \cdot 0.25\text{Et}_2\text{O}$ : C 40.63, H 4.76, N 9.87%. Found: C 40.80, H 4.51, N 10.10%.

### Complex 10

In the dark, a mixture of silver complex **5** (0.071 g, 0.10 mmol) and  $\text{RuHCl}(\text{CO})(\text{PPh}_3)_3$  (0.095 g, 0.10 mmol) in  $\text{CH}_2\text{Cl}_2$  (5 mL) was stirred under room temperature for 24 h. The solution was filtered through Celite and the solvent was removed under vacuum. The crude residue was purified by column chromatography. Elution with  $\text{CH}_2\text{Cl}_2$  :  $\text{CH}_3\text{OH}$  (10:1) afforded complex **10** as a yellow solid (0.068 g, 80%).

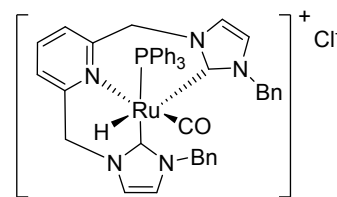

$^1\text{H}$  NMR (500MHz,  $\text{DMSO}-d_6$ ):  $\delta$  7.97 (t,  $J = 7.6$  Hz, 1H, py-H4), 7.77 (d,  $J = 7.6$  Hz, 1H, py-H3), 7.68 (s, 1H, imi-H3), 7.39 – 7.08 (m, 27H, py-H3 + imi-H3 + 15H arom  $\text{PPh}_3$  + 10 Ar-H), 6.85 (s, 1H, imi-H4), 6.84 (s, 1H, imi-H4), 5.86 (d,  $J = 14.3$  Hz, 1H, py-CHH), 5.74 – 5.61 (m, 3H, py-CHH +  $\text{NCH}_2$ ), 5.38 (d,  $J = 15.6$  Hz, 1H, py-CHH), 5.28 – 5.21 (m, 2H, 2  $\text{NCH}_2$ ), 4.17 (d,  $J = 15.3$  Hz, 1H, py-CHH), -7.15 (d,  $J_{\text{HP}} = 28.8$  Hz, 1H, Ru-H).

$^{13}\text{C}\{^1\text{H}\}$  NMR (125 MHz,  $\text{DMSO}-d_6$ ): 208.65 (d,  $^2J_{\text{CP}} = 14.0$  Hz, CO), 189.06 (d,  $^2J_{\text{CP}} = 8.2$  Hz, Ru-C), 182.32 (d,  $^2J_{\text{CP}} = 81.5$  Hz, Ru-C), 156.92 (s, py C2), 156.11 (d,  $^3J_{\text{CP}} = 2.2$  Hz, py C2), 139.73 (s, py C4), 136.61 (s, Ar

C1), 136.08 (s, Ar C1), 135.59 (d,  $^1J_{CP} = 39.2$  Hz, 3 C<sub>q</sub> arom, PPh<sub>3</sub>), 132.35 (d,  $^3J_{CP} = 10.9$  Hz, 6 CH arom, PPh<sub>3</sub>), 129.62 (d,  $^4J_{CP} = 1.5$  Hz, 3 CH arom, PPh<sub>3</sub>), 128.83 (s, 4 Ar C3), 128.50 (s, 2 Ar C2), 128.22 (d,  $^2J_{CP} = 8.0$  Hz, 6 CH arom, PPh<sub>3</sub>), 127.63 (s, 2 Ar C2), 126.60 (s, 2 Ar C4), 124.50 (s, py C3), 124.32 (s, py C3), 123.52 (s, imi-C4), 123.02 (s, imi-C4), 122.18 (s, imi-C3), 121.69 (s, imi-C3), 57.64 (s, py-CH<sub>2</sub>), 54.91 (s, py-CH<sub>2</sub>), 53.36 (s, NCH<sub>2</sub>), 52.82 (s, NCH<sub>2</sub>).

$^31P\{^1H\}$  NMR (202 MHz, DMSO-*d*<sub>6</sub>):  $\delta$  44.60 (s, PPh<sub>3</sub>)

IR (KBr):  $\nu(CO)$  1916 cm<sup>-1</sup>

MS [ESI]:  $m/z$  (%) = 811.99 [Ru(CNC<sub>Bn</sub>)(CO)(PPh<sub>3</sub>)(H)]<sup>+</sup> (25), 550.14 [Ru(CNC<sub>Bn</sub>)(CO)(H)]<sup>+</sup> (100), 520.26 [Ru(CNC<sub>Bn</sub>)]<sup>+</sup> (15).

EA: Calcd. C<sub>46</sub>H<sub>42</sub>ClN<sub>5</sub>OPRu\*3H<sub>2</sub>O: C 61.22, H 5.36, N 7.76%. Found: C 61.97, H 5.32, N 7.98%.

### Complex 11

A mixture of ruthenium complex **7** (0.121 g, 0.20 mmol) and NaBH<sub>4</sub> (0.010 g, 0.25 mmol) in CH<sub>3</sub>CH<sub>2</sub>OH (15 mL) and CH<sub>3</sub>CN (3 mL) was stirred under room temperature for 1 h. NH<sub>4</sub>PF<sub>6</sub> (0.160 g, 1.00 mmol, 5 equiv.) was then added to the resultant solution and stirred at room temperature for another 1 h. The resultant solution was evaporated and extracted with CH<sub>3</sub>CN (3 × 5 mL). The solvent was removed under vacuum and the crude residue was purified by column chromatography (CH<sub>2</sub>Cl<sub>2</sub> : CH<sub>3</sub>CN, 10:1). The complex was subsequently dissolved in some CH<sub>3</sub>CN and triturated with Et<sub>2</sub>O to afford complex **11** as a pale yellow solid (0.080 g, 70%).

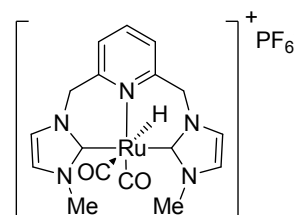

$^1H$  NMR (500MHz, DMSO-*d*<sub>6</sub>):  $\delta$  8.15 (t,  $J = 7.7$  Hz, 1H, py-H4), 7.80 (d,  $J = 6.5$  Hz, 2H, 2 py-H3), 7.65 (s, 1H, imi-H3), 7.63 (s, 1H, imi-H3), 7.51 (s, 1H, imi-H4), 7.44 (s, 1H, imi-H4), 5.87 (d,  $J = 15.8$  Hz, 1H, py-CHH), 5.73 (d,  $J = 14.5$  Hz, 1H, py-CHH), 5.10 (d,  $J = 15.8$  Hz, 1H, py-CHH), 4.87 (d,  $J = 14.4$  Hz, 1H, py-CHH), 3.86 (s, 3H, NCH<sub>3</sub>), 3.77 (s, 3H, NCH<sub>3</sub>), -5.10 (s, 1H, Ru-H).

$^{13}C\{^1H\}$  NMR (125 MHz, DMSO-*d*<sub>6</sub>):  $\delta$  203.68 (s, CO), 193.46 (s, CO), 178.82 (s, Ru-C), 177.70 (s, Ru-C), 156.75 (s, py C2), 155.95 (s, py C2), 140.46 (s, py C4), 125.23 (s, 2 py C3), 123.43 (s, imi-C4), 123.35 (s, imi-C4), 122.10 (s, imi-C3), 121.77 (s, imi-C3), 56.36 (s, py-CH<sub>2</sub>), 55.82 (s, py-CH<sub>2</sub>), 38.25 (s, NCH<sub>3</sub>), 37.20 (s, NCH<sub>3</sub>).

IR (KBr):  $\nu(CO)$  2032, 1973 cm<sup>-1</sup>

MS [ESI]:  $m/z$  (%) = 425.81 [Ru(CNC<sub>Me</sub>)(CO)<sub>2</sub>(H)]<sup>+</sup> (10), 398.10 [Ru(CNC<sub>Me</sub>)(CO)(H)]<sup>+</sup> (100), 370.16 [Ru(CNC<sub>Me</sub>)(H)]<sup>+</sup> (20).

EA: Calcd. C<sub>17</sub>H<sub>20</sub>F<sub>6</sub>N<sub>5</sub>O<sub>2</sub>PRu: C 35.67, H 3.52, N 12.23%. Found: C 35.72, H 3.33, N 12.27%.

### Complex 12

A mixture of ruthenium complex **8** (0.152 g, 0.20 mmol) and NaBH<sub>4</sub> (0.010 g, 0.25 mmol) in CH<sub>3</sub>CH<sub>2</sub>OH (15 mL) and CH<sub>3</sub>CN (3 mL) was stirred under room temperature for 1 h. NH<sub>4</sub>PF<sub>6</sub> (0.160 g, 1.00 mmol, 5 equiv.) was then added to the resultant solution and stirred at room temperature for another 1 h. The resultant solution was evaporated and extracted with CH<sub>3</sub>CN (3 × 5 mL). The solvent was removed under vacuum and the crude residue was purified by column chromatography (CH<sub>2</sub>Cl<sub>2</sub> : CH<sub>3</sub>CN, 20:1).

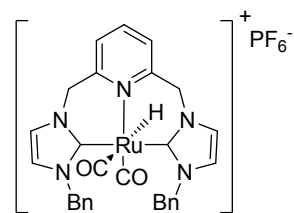

The complex was subsequently dissolved in some CH<sub>3</sub>CN and triturated with Et<sub>2</sub>O to afford complex **12** as a pale yellow solid (0.117 g, 80%).

<sup>1</sup>H NMR (500MHz, DMSO-*d*<sub>6</sub>): δ 8.19 (t, *J* = 7.7 Hz, 1H, py-H4), 7.85 (d, *J* = 7.7 Hz, 2H, 2 py-H3), 7.73 (s, 1H, imi-H3), 7.71 (s, 1H, imi-H3), 7.37 – 7.28 (m, 8H, 2 imi-H4 + 6 Ar-H), 7.16 – 7.14 (m, 4H, 4 Ar-H), 5.92 (d, *J* = 16.0 Hz, 1H, py-CHH), 5.80 (d, *J* = 14.6 Hz, 1H, py-CHH), 5.41 – 5.34 (m, 4H, 2 NCH<sub>2</sub>), 5.21 (d, *J* = 15.9 Hz, 1H, py-CHH), 4.97 (d, *J* = 14.3 Hz, 1H, py-CHH), -4.99 (s, 1H, Ru-H).

<sup>13</sup>C{<sup>1</sup>H} NMR (125 MHz, DMSO-*d*<sub>6</sub>): 202.85 (s, CO), 193.28 (s, CO), 179.13 (s, Ru-C), 178.31 (s, Ru-C), 156.92 (s, py C2), 156.08 (s, py C2), 140.54 (s, py C4), 136.78 (s, Ar C1), 136.46 (s, Ar C1), 128.68 (s, 2 Ar C3), 128.62 (s, 2 Ar C3), 127.81 (s, 2 Ar C2), 127.59 (s, 2 Ar C2), 126.88 (s, py C3), 126.68 (s, py C3), 125.32 (s, 2 Ar C4), 123.25 (s, imi-C4), 123.03 (s, imi-C4), 122.39 (s, imi-C3), 122.35 (s, imi-C3), 56.54 (s, py-CH<sub>2</sub>), 55.95 (s, py-CH<sub>2</sub>), 53.35 (s, NCH<sub>2</sub>), 52.88 (s, NCH<sub>2</sub>).

IR (KBr): ν(CO) 2042, 1956 cm<sup>-1</sup>

MS [ESI]: *m/z* (%) = 577.87 [Ru(CNC<sub>Bn</sub>)(CO)<sub>2</sub>(H)]<sup>+</sup> (5), 550.13 [Ru(CNC<sub>Bn</sub>)(CO)(H)]<sup>+</sup> (100), 520.25 [Ru(CNC<sub>Bn</sub>) - H]<sup>+</sup> (45).

EA: Calcd. C<sub>29</sub>H<sub>28</sub>F<sub>6</sub>N<sub>5</sub>O<sub>2</sub>PRu: C 48.07, H 3.89, N 9.67%. Found: C 48.04, H 3.63, N 9.71%.

### Complex 13

A mixture of ruthenium complex **9** (0.138 g, 0.20 mmol) and NaBH<sub>4</sub> (0.010 g, 0.25 mmol) in CH<sub>3</sub>CH<sub>2</sub>OH (15 mL) and CH<sub>3</sub>CN (3 mL) was stirred under room temperature for 1 h. NH<sub>4</sub>PF<sub>6</sub> (0.160 g, 1.00 mmol, 5 equiv.) was then added to the resultant solution and stirred at room temperature for another 1 h. The resultant solution was evaporated and extracted with CH<sub>3</sub>CN (3 × 5 mL). The

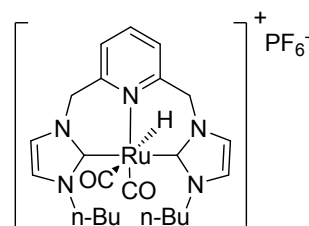

solvent was removed under vacuum and the crude residue was purified by column chromatography (CH<sub>2</sub>Cl<sub>2</sub> : CH<sub>3</sub>CN, 20:1). The complex was subsequently dissolved in some CH<sub>3</sub>CN and triturated with Et<sub>2</sub>O to afford complex **13** as a pale yellow solid (0.096 g, 73%).

<sup>1</sup>H NMR (500MHz, DMSO-*d*<sub>6</sub>): δ 8.15 (t, *J* = 7.3 Hz, 1H, py-H4), 7.80 (s, 2H, 2 py-H3), 7.69 (s, 1H, imi-H3), 7.65 (s, 1H, imi-H3), 7.60 (s, 1H, imi-H4), 7.50 (s, 1H, imi-H4), 5.85 (d, *J* = 15.9 Hz, 1H, py-CHH), 5.72 (d, *J* = 14.5 Hz, 1H, py-CHH), 5.12 (d, *J* = 15.8 Hz, 1H, py-CHH), 4.89 (d, *J* = 14.3 Hz, 1H, py-CHH), 4.13 – 4.06 (m, 4H, 2 NCH<sub>2</sub>), 1.83 – 1.72 (m, 4H, 2 CH<sub>2</sub>), 1.42 – 1.36 (m, 4H, 2 CH<sub>2</sub>), 0.93 – 0.91 (m, 6H, 2 CH<sub>3</sub>), -5.08 (s, 1H, Ru-H).

<sup>13</sup>C{<sup>1</sup>H} NMR (125 MHz, DMSO-*d*<sub>6</sub>): δ 203.90 (s, CO), 193.66 (s, CO), 177.468 (s, Ru-C), 176.85 (s, Ru-C), 156.90 (s, py C2), 156.05 (s, py C2), 140.46 (s, py C4), 125.17 (s, 2 py C3), 122.81 (s, imi-C4), 122.34 (s, imi-C4), 121.89 (s, imi-C3), 121.53 (s, imi-C3), 56.41 (s, py-CH<sub>2</sub>), 55.81 (s, py-CH<sub>2</sub>), 50.168 (s, NCH<sub>2</sub>), 49.63 (s, NCH<sub>2</sub>), 32.45 (s, CH<sub>2</sub>), 32.39 (s, CH<sub>2</sub>), 19.37 (s, CH<sub>2</sub>), 19.29 (s, 2 CH<sub>2</sub>), 13.48 (s, 2 CH<sub>3</sub>).

IR (KBr): ν(CO) 2024, 1963 cm<sup>-1</sup>

MS [ESI]: *m/z* (%) = 509.88 [Ru(CNC<sub>n-Bu</sub>)(CO)<sub>2</sub>(H)]<sup>+</sup> (5), 482.17 [Ru(CNC<sub>n-Bu</sub>)(CO)(H)]<sup>+</sup> (100), 450.22 [Ru(CNC<sub>n-Bu</sub>) - 2H]<sup>+</sup> (35).

EA: Calcd. C<sub>23</sub>H<sub>32</sub>F<sub>6</sub>N<sub>5</sub>O<sub>2</sub>PRu\*0.25Et<sub>2</sub>O: C 42.70, H 5.15, N 10.37%. Found: C 42.48, H 4.97, N 10.00%.

### Complex 14

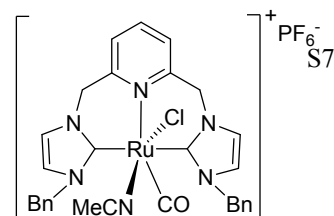

A mixture of ruthenium complex **8** (0.152 g, 0.20 mmol) and trimethylamine *N*-oxide (0.016 g, 0.22 mmol) in CH<sub>3</sub>CN (6 mL) was stirred under reflux for 12 h. After cooling to room temperature, the solution was filtered through Celite and the solvent was removed under vacuum. The crude residue was purified by column chromatography (CH<sub>2</sub>Cl<sub>2</sub> : CH<sub>3</sub>CN, 20:1). The complex was subsequently dissolved in some CH<sub>3</sub>CN and triturated with Et<sub>2</sub>O to afford complex **14** as a yellow solid (0.130 g, 84%).

<sup>1</sup>H NMR (500MHz, DMSO-*d*<sub>6</sub>): δ 8.26 (t, *J* = 7.7 Hz, 1H, py-H4), 7.90 – 7.86 (m, 2H, 2 py-H3), 7.70 (s, 1H, imi-H3), 7.68 (s, 1H, imi-H3), 7.41 - 7.20 (m, 12H, 2 imi-H4 + 10Ar-H), 6.52 (d, *J* = 15.1 Hz, 1H, py-CHH), 5.76 – 5.44 (m, 7H, 3 py-CHH + 2 NCH<sub>2</sub>), 2.21 (s, 3H, coordinated CH<sub>3</sub>CN).

<sup>13</sup>C {<sup>1</sup>H} NMR (125 MHz, DMSO-*d*<sub>6</sub>): δ 204.39 (s, CO), 179.83 (s, Ru-C), 179.06 (s, Ru-C), 157.38 (s, py C2), 156.80 (s, py C2), 141.06 (s, py C4), 137.31 (s, 2 Ar C1), 129.15 (s, coordinated CH<sub>3</sub>CN), 128.72 (s, 2 Ar C3), 128.59 (s, 2 Ar C3), 127.74 (s, 2 Ar C2), 127.64 (s, 2 Ar C2), 127.41 (s, 2 Ar C4), 127.07 (s, py C3), 126.89 (s, py C3), 125.93 (s, imi-C4), 123.65 (s, imi-C4), 123.10 (s, imi-C3), 122.24 (s, imi-C3), 53.72 (s, py-CH<sub>2</sub>), 53.50 (s, py-CH<sub>2</sub>), 52.45 (s, 2 NCH<sub>2</sub>), 3.99 (s, coordinated CH<sub>3</sub>CN).

IR (KBr): ν(CO) 1962 cm<sup>-1</sup>

MS [ESI]: *m/z* (%) = 624.93 [Ru(CNC<sub>Bn</sub>)(CO)(Cl)(MeCN)]<sup>+</sup> (60), 583.97 [Ru(CNC<sub>Bn</sub>)(CO)(Cl)]<sup>+</sup> (100), 556.05 [Ru(CNC<sub>Bn</sub>)(Cl)]<sup>+</sup> (65), 520.24 [Ru(CNC<sub>Bn</sub>)]<sup>+</sup> (80).

EA: Calcd. C<sub>30</sub>H<sub>29</sub>ClF<sub>6</sub>N<sub>6</sub>OPRu: C 46.73, H 3.79, N 10.90%. Found: C 46.49, H 3.51, N 10.88%.

#### **Potassium tert-butyl carbonate (KOCO<sub>2</sub>tBu)<sup>11</sup>**

A mixture of potassium *tert*-butoxide (2.24 g, 20.0 mmol) and dry THF (120 mL) were added to a flame-dried 250 mL two-necked round bottom flask under an argon atmosphere. The mixture was stirred vigorously until all the potassium *tert*-butoxide was dissolved. 150 g of dry ice (solid CO<sub>2</sub>) was added slowly in small portions (~15 g). The slurry was stirred vigorously for 1 h under an argon atmosphere. The solvent was removed under vacuum to afford KOCO<sub>2</sub>tBu as an off-white solid (2.66 g, 85%)

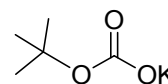

<sup>1</sup>H NMR (500MHz, D<sub>2</sub>O): δ 1.23 (s, 9H, t-Bu)

<sup>13</sup>C {<sup>1</sup>H} NMR (125 MHz, D<sub>2</sub>O): δ 30.34 (s, C(CH<sub>3</sub>)<sub>3</sub>), 70.01 (s, C(CH<sub>3</sub>)<sub>3</sub>), 161.19 (s, KOCO<sub>2</sub>tBu)



**S3. Selected crystal data, data collection, and refinement parameters for complex 12 and 14**

|                                   | Complex 12                                                                                       | Complex 14                                                                                                     |
|-----------------------------------|--------------------------------------------------------------------------------------------------|----------------------------------------------------------------------------------------------------------------|
| Empirical formula                 | C <sub>31</sub> H <sub>30</sub> Cl <sub>4</sub> F <sub>6</sub> N <sub>5</sub> O <sub>2</sub> PRu | C <sub>31</sub> H <sub>30</sub> Cl <sub>3</sub> F <sub>6</sub> N <sub>6</sub> OPRu                             |
| Formula weight                    | 892.44                                                                                           | 855.00                                                                                                         |
| Temperature of data collection    | 100(2) K                                                                                         | 100(2) K                                                                                                       |
| Wavelength                        | 0.71073 Å                                                                                        | 0.71073 Å                                                                                                      |
| Crystal size                      | 0.097 x 0.156 x 0.226 mm <sup>3</sup>                                                            | 0.092 x 0.147 x 0.322 mm <sup>3</sup>                                                                          |
| Crystal system                    | Orthorhombic                                                                                     | Triclinic                                                                                                      |
| Space group                       | P b c a                                                                                          | P -1                                                                                                           |
| Unit cell dimensions              | a = 16.6675(5) Å    α = 90°<br>b = 11.1422(3) Å    β = 90°<br>c = 38.2172(12) Å    γ = 90°       | a = 10.630(4) Å    α = 77.336(14)°<br>b = 12.402(5) Å    β = 74.113(10)°<br>c = 14.118(5) Å    γ = 79.124(10)° |
| Volume                            | 7097.4(4) Å <sup>3</sup>                                                                         | 1730.1(11) Å <sup>3</sup>                                                                                      |
| Z                                 | 8                                                                                                | 2                                                                                                              |
| Density (calculated)              | 1.670 g/m <sup>3</sup>                                                                           | 1.641 g/m <sup>3</sup>                                                                                         |
| F(000)                            | 3584                                                                                             | 860                                                                                                            |
| Theta range for data collection   | 2.26 to 27.10°                                                                                   | 2.21 to 28.23°                                                                                                 |
| Reflections collected             | 16701                                                                                            | 42950                                                                                                          |
| Independent reflections           | 7823 [R(int) = 0.0520]                                                                           | 8519 [R(int) = 0.0524]                                                                                         |
| Goodness-of-fit on F <sup>2</sup> | 1.096                                                                                            | 1.036                                                                                                          |
| Final R indices [I>2σ(I)]         | R1 = 0.0630, wR2 = 0.1284                                                                        | R1 = 0.0413, wR2 = 0.0949                                                                                      |
| R indices (all data)              | R1 = 0.0973, wR2 = 0.1407                                                                        | R1 = 0.0539, wR2 = 0.0994                                                                                      |
| Largest diff. peak and hole       | 1.443 and -1.154 eÅ <sup>-3</sup>                                                                | 1.228 and -1.320 eÅ <sup>-3</sup>                                                                              |

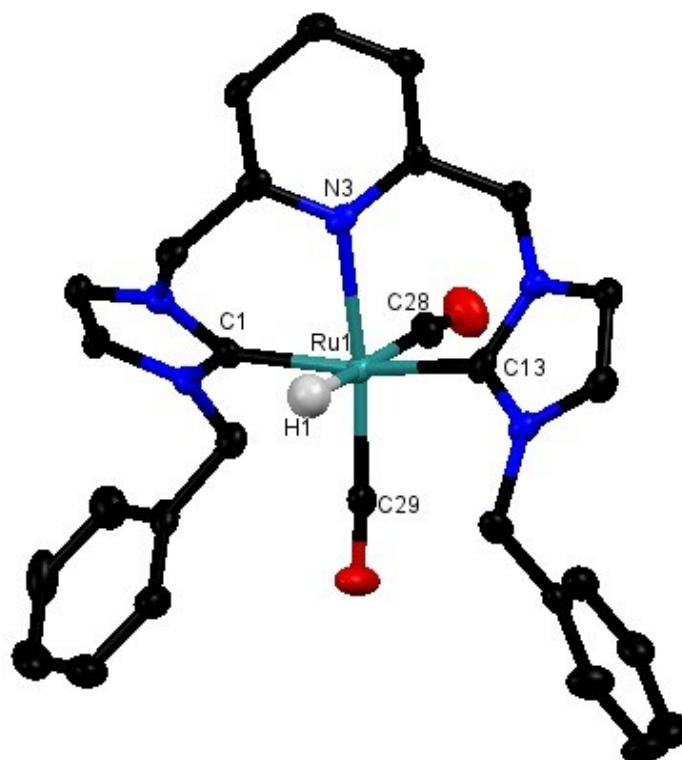

Figure S1. Crystal structure of complex **12**. (50% probability ellipsoids, Hydrogen atoms, with exception of the hydrido ligand, solvent molecules and PF<sub>6</sub> anions have been omitted for clarity)

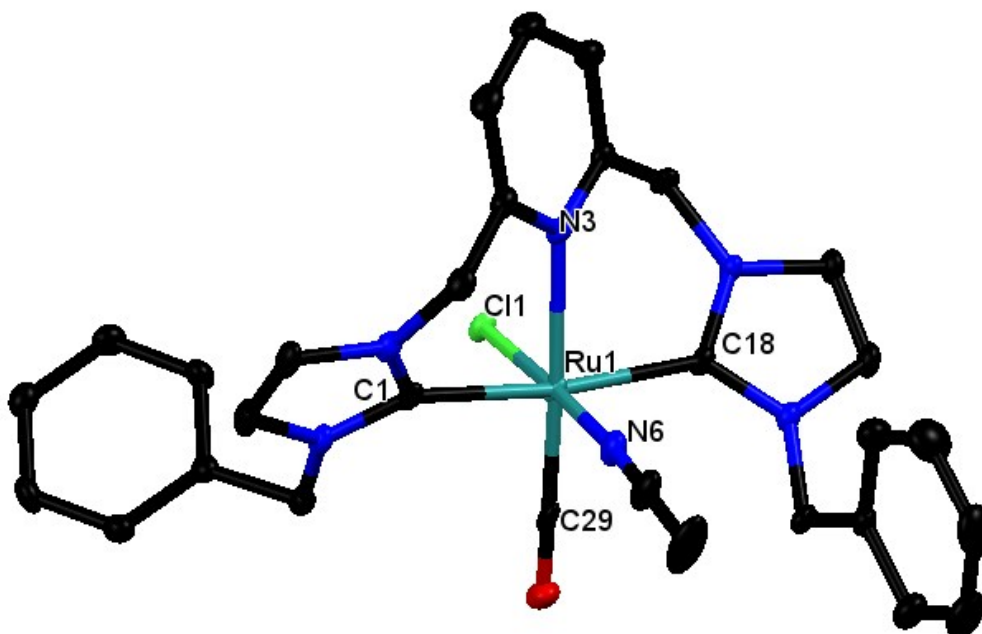

Figure S2. Crystal structure of complex **14**. (50% probability ellipsoids, Hydrogen atoms, solvent molecules and PF<sub>6</sub> anions have been omitted for clarity)

## S4. Hydroboration procedures

**Typical procedure for the hydroboration of CO<sub>2</sub> (Table 1, 2 and S3).** In a 25 mL oven-dried Schlenk tube, the alkali metal salt (0.030 mmol, 2.5 mol%) and 1,3,5-trimethoxybenzene (0.050 mmol, 8.4 mg, internal standard) was added under 1 atm of carbon dioxide. 2 mL of CD<sub>2</sub>Cl<sub>2</sub> was added followed by HBpin (1 equivalent, 1.2 mmol, 153.6 mg) and the reaction mixture was stirred vigorously at room temperature. The Ru-CNC catalyst (0.012 mmol, 1 mol%) was subsequently added. 0.4 mL aliquots of the reaction mixture was transferred to a NMR tube at 30 and 60 min intervals for analysis. The formation of HCOOBpin was monitored over time using <sup>1</sup>H NMR and <sup>11</sup>B {<sup>1</sup>H} NMR spectroscopy.

Table S3. Screening of solvents for the Hydroboration of CO<sub>2</sub><sup>a</sup>

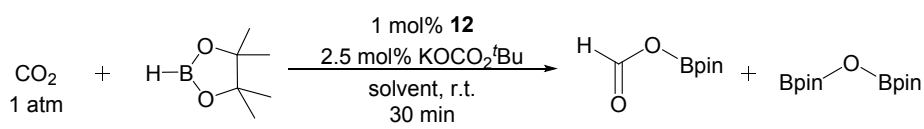

| Entry | Solvent                         | Yield of                  |                                        |
|-------|---------------------------------|---------------------------|----------------------------------------|
|       |                                 | HCOOBpin (%) <sup>b</sup> | (Bpin) <sub>2</sub> O (%) <sup>b</sup> |
| 1     | CD <sub>2</sub> Cl <sub>2</sub> | 76                        | 10                                     |
| 2     | DMF- <i>d</i> <sub>7</sub>      | 67                        | 7                                      |
| 3     | THF- <i>d</i> <sub>8</sub>      | 56                        | 23                                     |
| 4     | DMSO- <i>d</i> <sub>6</sub>     | 45                        | 7                                      |
| 5     | CD <sub>3</sub> CN              | 8                         | n.d. <sup>c</sup>                      |

<sup>a</sup>HBpin (1.2 mmol), solvent (2 mL), complex **12** (1 mol%), KOCO<sub>2</sub>tBu (2.5 mol%), 1,3,5-trimethoxybenzene (0.05 mmol, internal standard), 1 atm CO<sub>2</sub>, r.t.. <sup>b</sup>Determined using <sup>1</sup>H NMR spectroscopy by integration against an internal standard, 1,3,5-trimethoxybenzene. <sup>c</sup>n.d.: not detected in the <sup>1</sup>H NMR spectra of the crude mixtures.

## S5. $^1\text{H}$ NMR and ESI-MS of reactions

**Reaction of complex 12 with KO<sup>t</sup>Bu under CO<sub>2</sub> and N<sub>2</sub>.** In a 25 mL oven-dried Schlenk tube, complex 12 (0.012 mmol, 8.8 mg) and KO<sup>t</sup>Bu (2.5 equiv, 3.4 mg) was added under 1 atm of carbon dioxide or nitrogen. 0.60 mL of THF-*d*<sub>8</sub> was then added and the reaction mixture was stirred vigorously at room temperature for 1 h. The reaction mixtures were then transferred to NMR tubes for analysis. Complex 12 decomposed in nitrogen into intractable mixtures in the presence of KO<sup>t</sup>Bu but remained unchanged in carbon dioxide in the presence of KO<sup>t</sup>Bu.

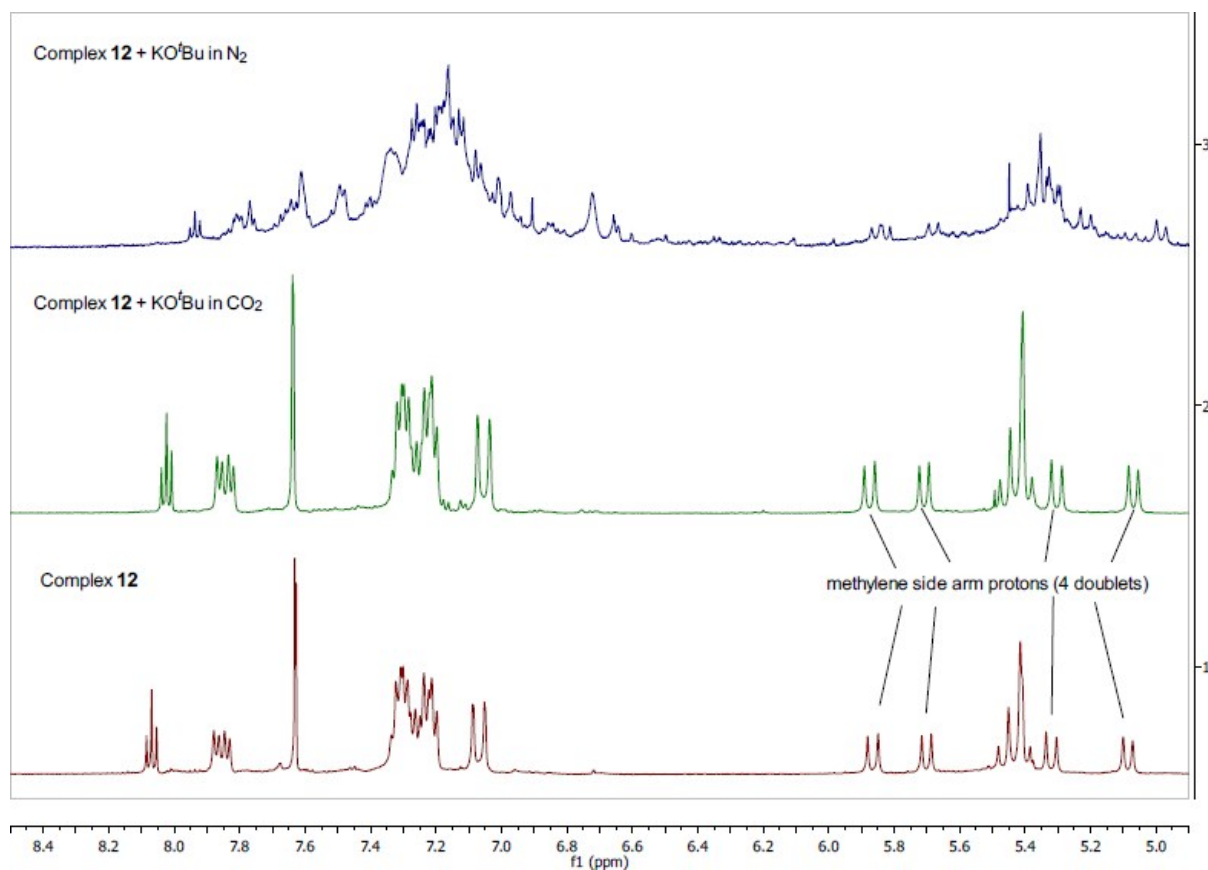

Figure S4.  $^1\text{H}$  NMR of complex 12 with KO<sup>t</sup>Bu in CO<sub>2</sub> and N<sub>2</sub> atmospheres

**Reaction of complex **14** with HBpin.** Complex **14** (0.005 mmol, 3.9 mg), HBpin (0.5 mmol, 72.6  $\mu$ L) and 0.60 mL of DCM- $d_2$  was added into a J Young NMR tube in a glovebox. The reaction mixture was shaken occasionally at room temperature for 1 h and then analysed by  $^1\text{H}$  NMR. The formation of a Ru-H species can be seen by the peak at -5.04 ppm.

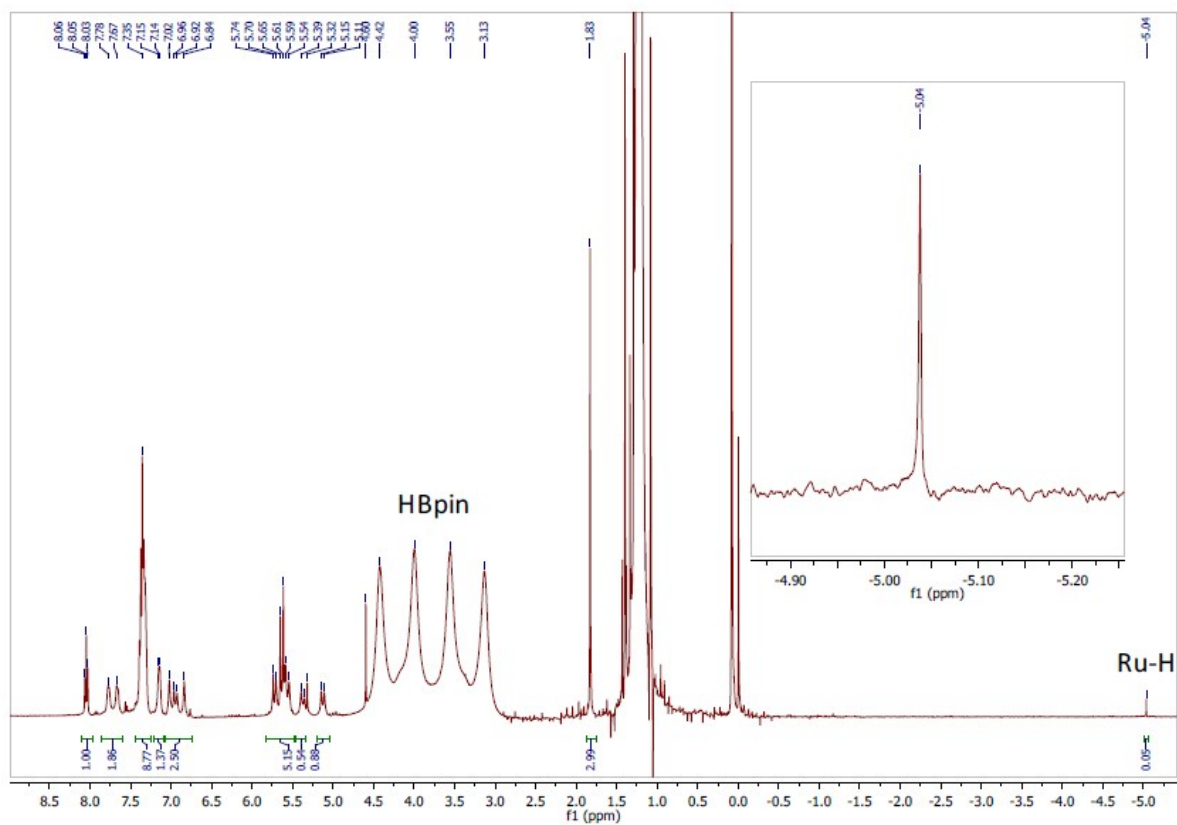

Figure S5.  $^1\text{H}$  NMR of the reaction between **14** and excess HBpin in  $\text{CD}_2\text{Cl}_2$

**Stoichiometric reaction of complex **12** with HBpin (1:1 ratio).** In a 25 mL oven-dried Schlenk tube, complex **12** (0.01 mmol, 7.3 mg), HBpin (0.01 mmol, 1.41 mg, 1.45  $\mu$ L) and 0.6 mL of  $\text{CD}_2\text{Cl}_2$  were added and the reaction mixture was stirred vigorously at room temperature for 1 h. The reaction mixture was then transferred to an NMR tube for analysis. No changes were observed in the  $^1\text{H}$  NMR of **12**. This observation is consistent with our proposed mechanism that it is more likely for **12** to react with  $\text{CO}_2$  rather than HBpin.

Some HBpin hydrolysed due to adventitious moisture to give Bpin-OH and  $\text{H}_2$ .<sup>12</sup> However, upon addition of an excess of HBpin to **12** (100:1 ratio), only a trace amount of HBpin was observed to be hydrolysed in  $^{11}\text{B}$   $\{^1\text{H}\}$  NMR analysis.

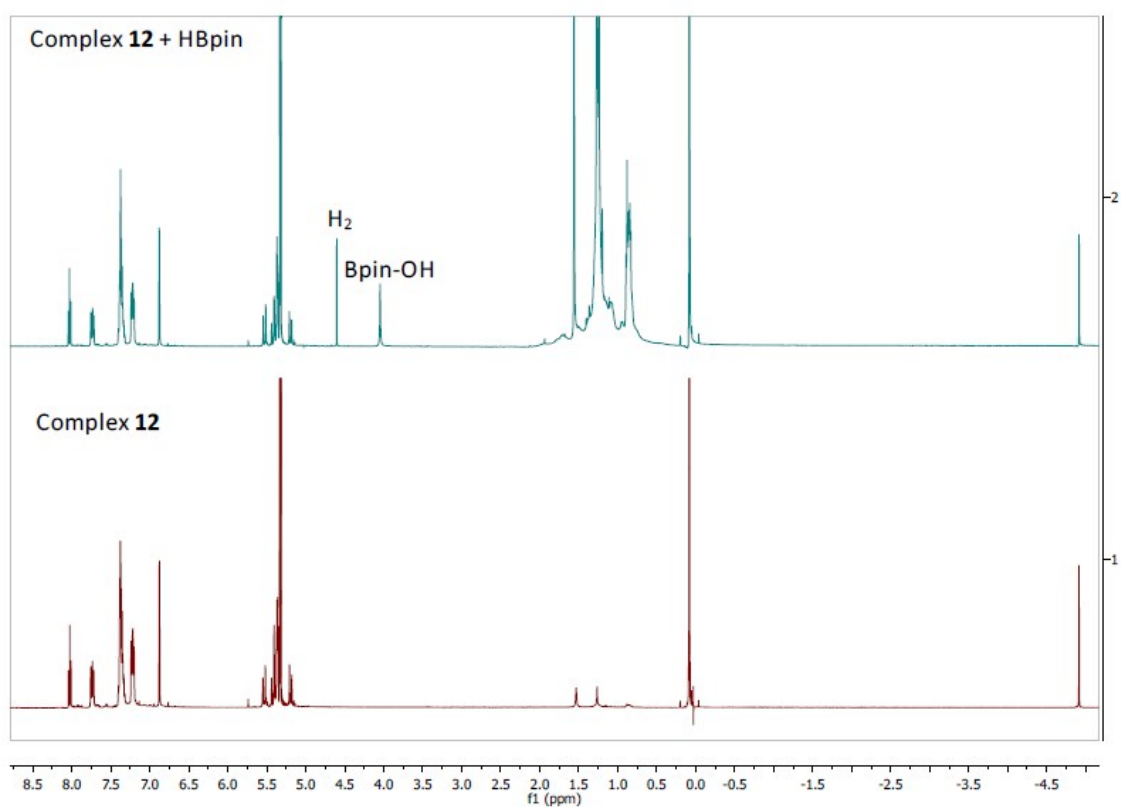

Figure S6.  $^1\text{H}$  NMR of complex **12** and the stoichiometric reaction of complex **12** with HBpin (1:1 ratio) at r.t. in  $\text{CD}_2\text{Cl}_2$

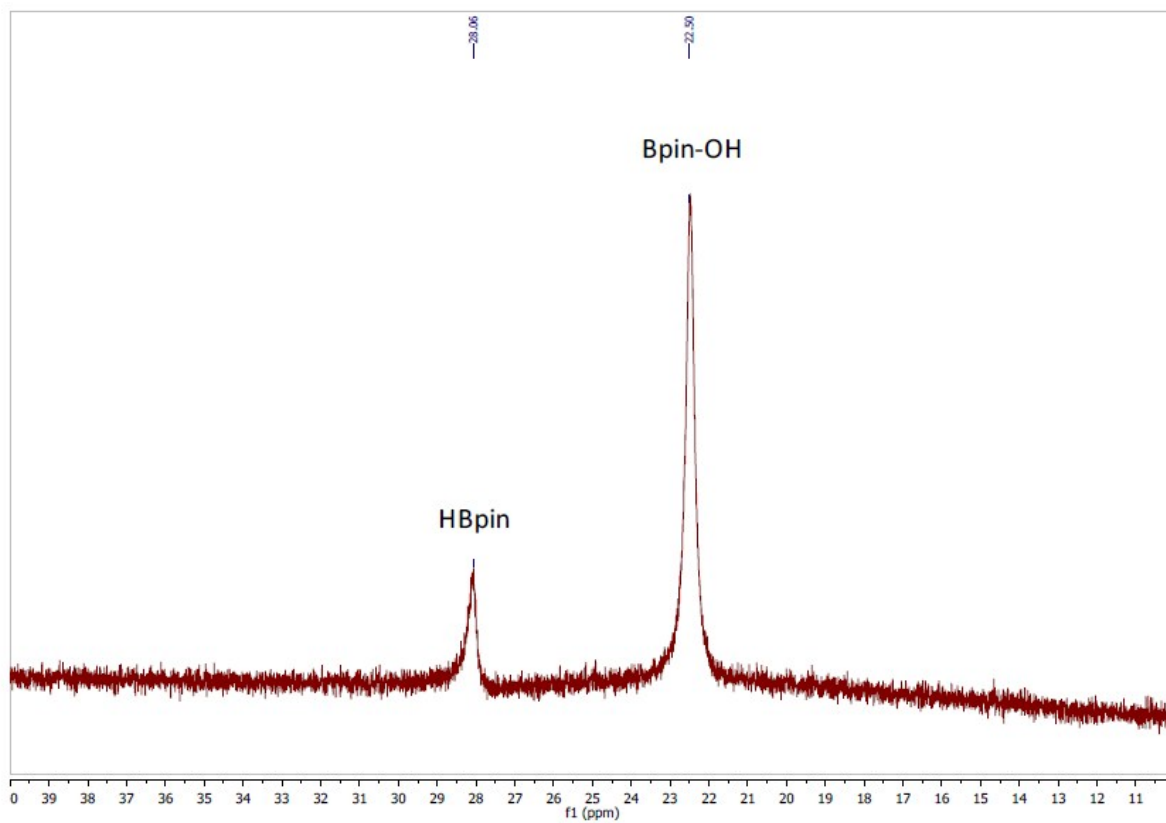

Figure S7.  $^1\text{H}$  NMR of the stoichiometric reaction of complex **12** with HBpin (1:1 ratio) at r.t. in  $\text{CD}_2\text{Cl}_2$

**Reaction of excess HBpin with complex 12 (100:1 ratio).** In a 25 mL oven-dried Schlenk tube, complex **12** (0.01 mmol, 7.3 mg), HBpin (1 mmol, 130 mg) and 0.6 mL of CD<sub>2</sub>Cl<sub>2</sub> were added and the reaction mixture was stirred vigorously at room temperature for 1 h. The reaction mixture was then transferred to an NMR tube for analysis. Only a trace amount of HBpin was observed to be hydrolysed via <sup>11</sup>B {<sup>1</sup>H} NMR.

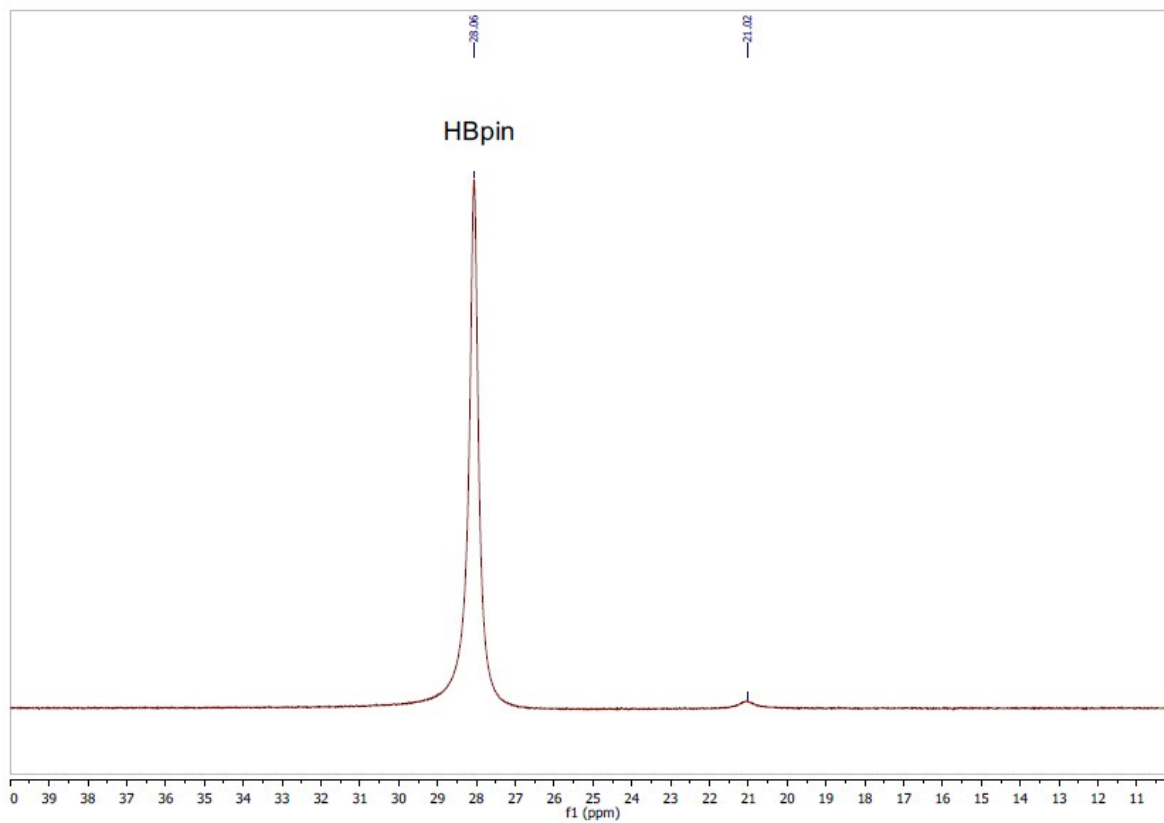

Figure S8. <sup>11</sup>B {<sup>1</sup>H} NMR of the reaction of excess HBpin with complex **12** (100:1 ratio) at r.t. in CD<sub>2</sub>Cl<sub>2</sub>



**Reaction of excess HBpin with KOCO<sub>2</sub>tBu (40:1 ratio).** In a 25 mL oven-dried Schlenk tube, KOCO<sub>2</sub>tBu (0.03 mmol, 4.7 mg), HBpin (1.2 mmol, 153.6 mg) and 1.5 mL of THF-*d*<sub>8</sub> were added and the reaction mixture was stirred vigorously at room temperature for 1 h. 0.5 mL of the reaction mixture was then transferred to an NMR tube for analysis. A broad peak appeared in the <sup>11</sup>B {<sup>1</sup>H} NMR at ~2.7 ppm which may suggest the formation of boron “ate” species similar to **B**.

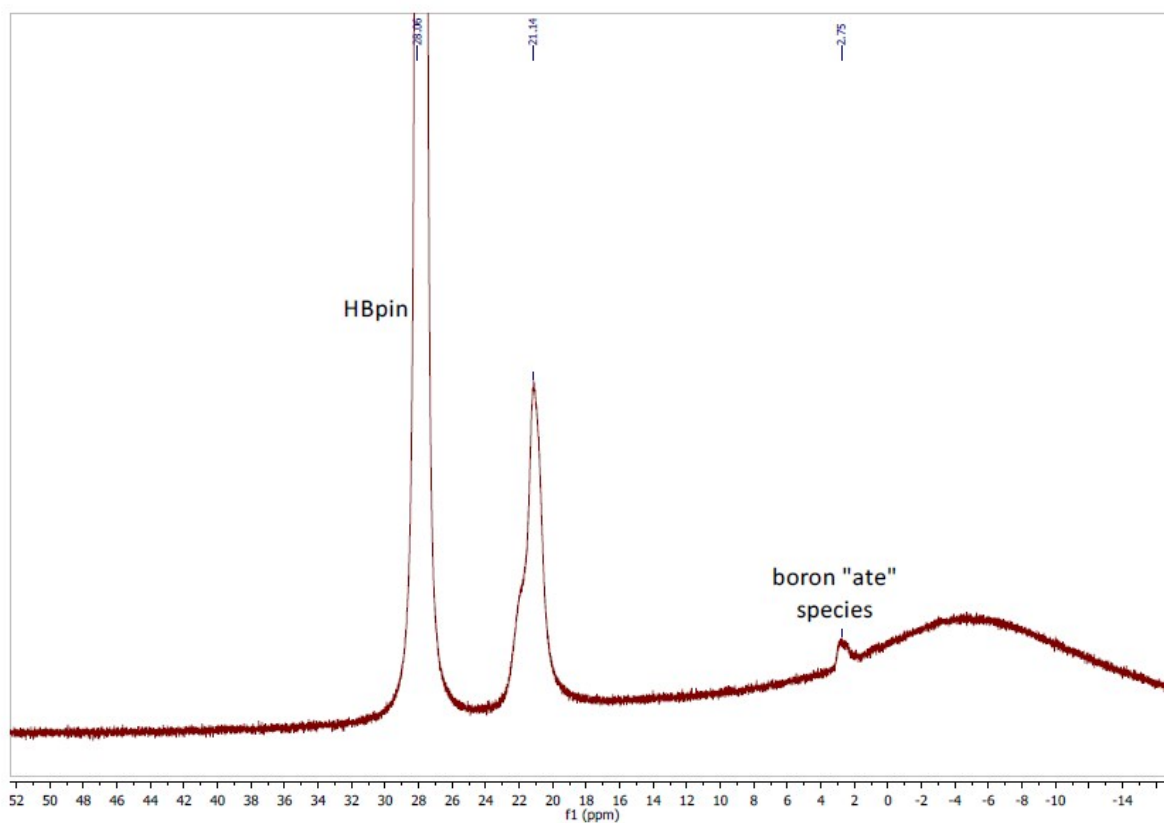

Figure S9. <sup>11</sup>B {<sup>1</sup>H} NMR of the reaction of excess HBpin with KOCO<sub>2</sub>tBu (40:1 ratio) at r.t. in THF-*d*<sub>8</sub>

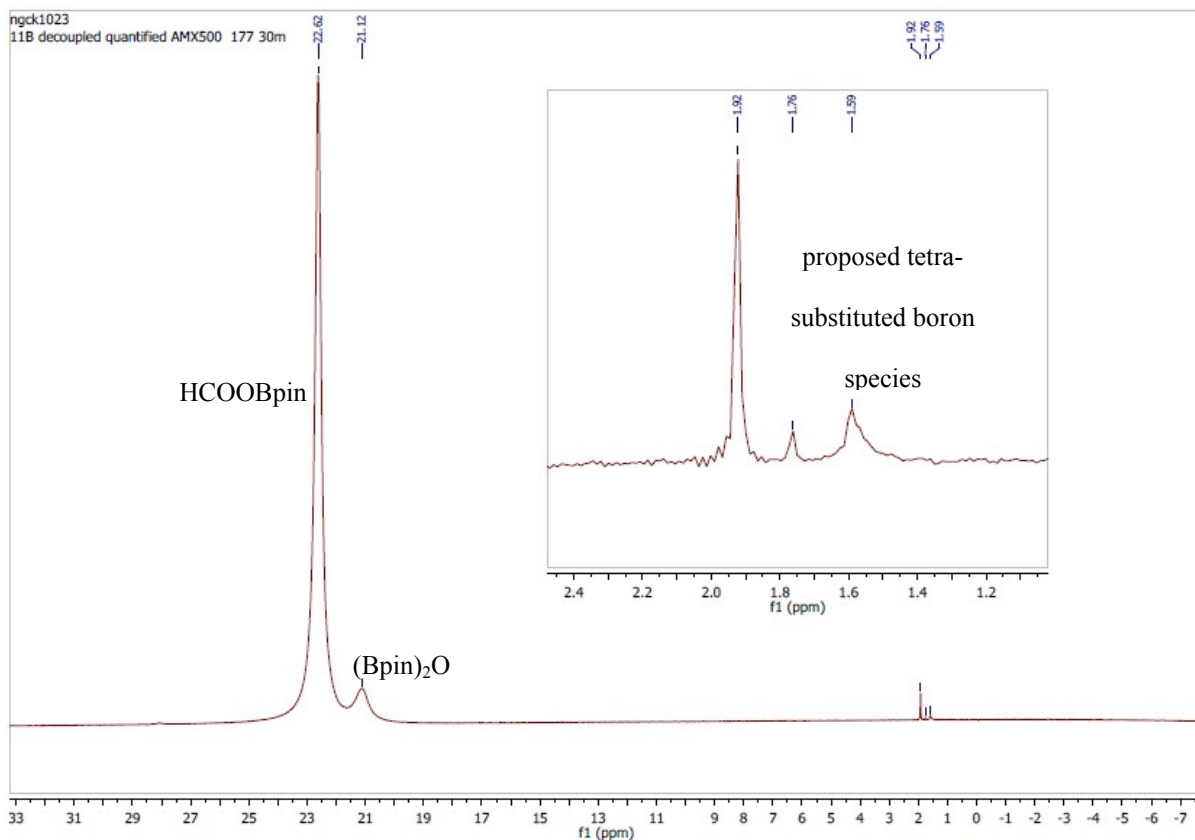

Figure S10.  $^{11}\text{B}$   $\{^1\text{H}\}$  NMR of the reaction mixture using complex **12** as catalyst and  $\text{KOCO}_2^t\text{Bu}$  as alkali metal salt after 0.5 h

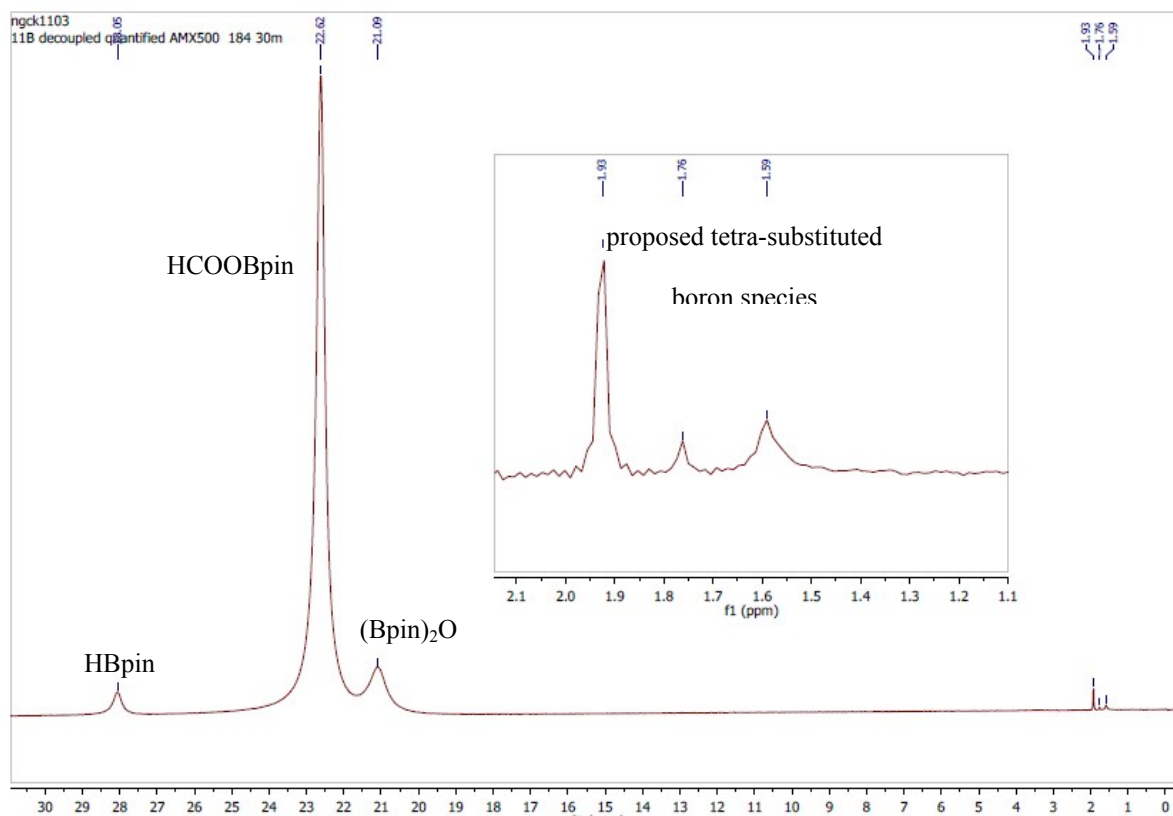

Figure S11.  $^{11}\text{B} \{^1\text{H}\}$  NMR of the reaction mixture using complex **12** as catalyst and  $\text{KHCO}_3$  as alkali metal salt after 0.5 h

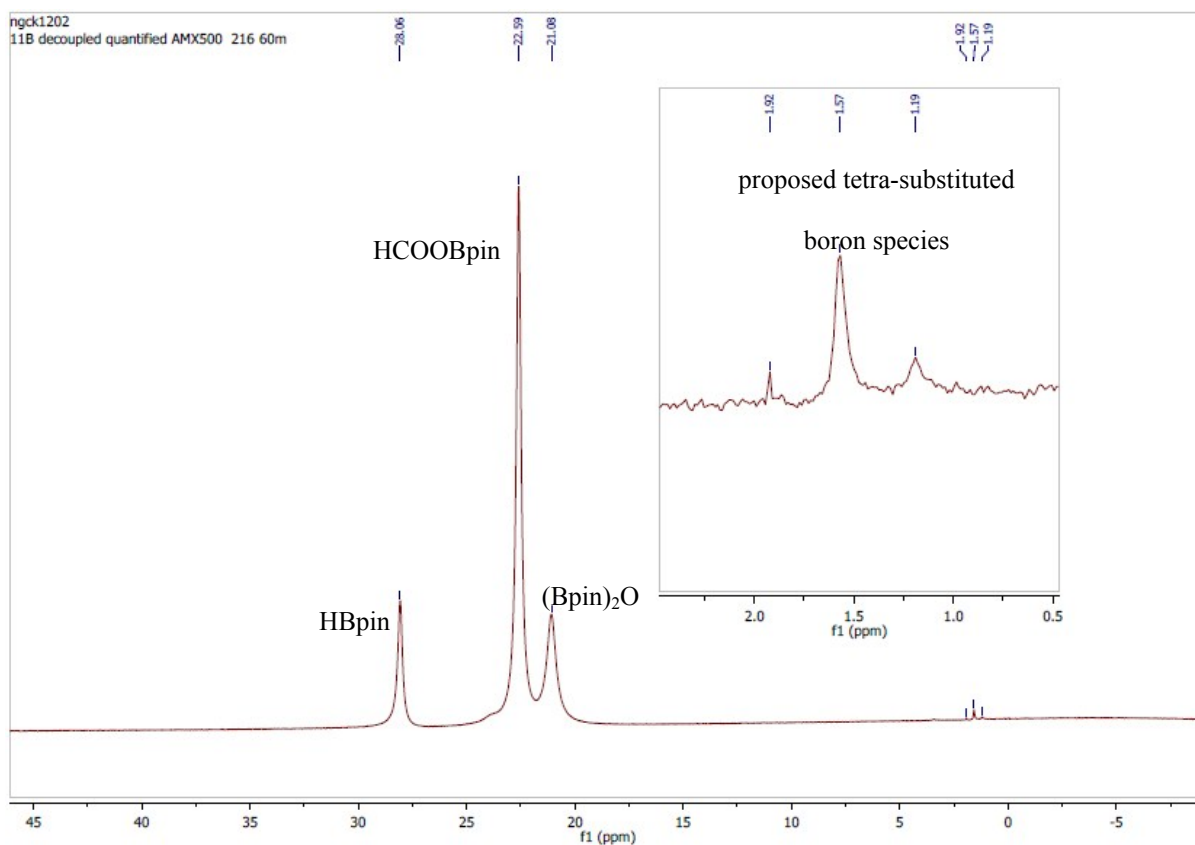

Figure S12.  $^{11}\text{B}$   $\{^1\text{H}\}$  NMR of the reaction mixture using complex **12** as catalyst and potassium phthalimide as alkali metal salt after 1 h

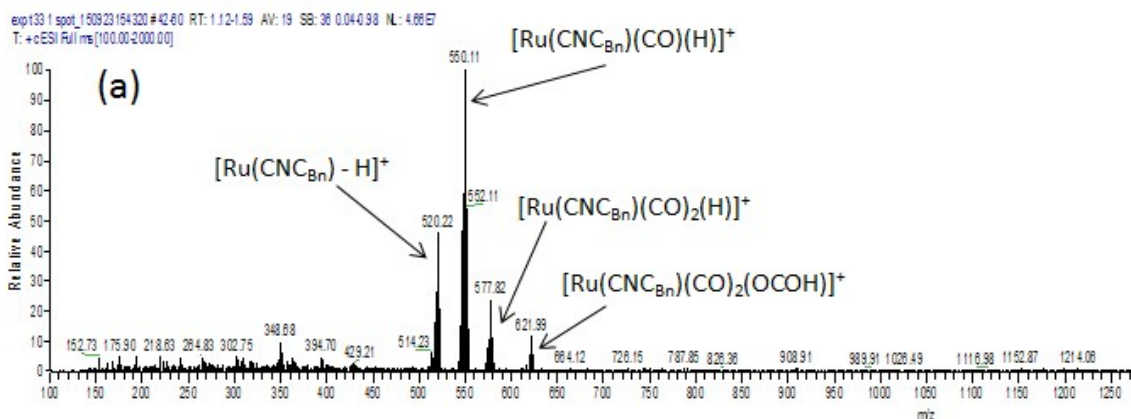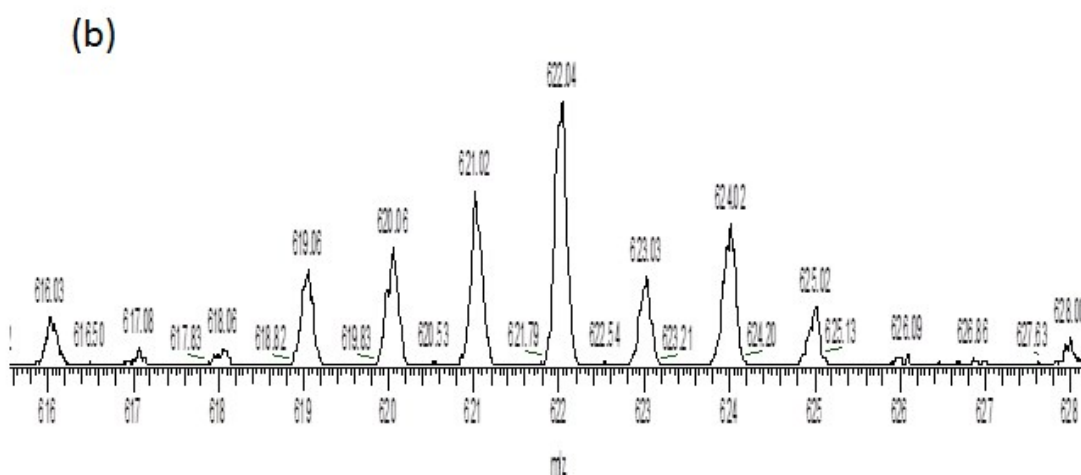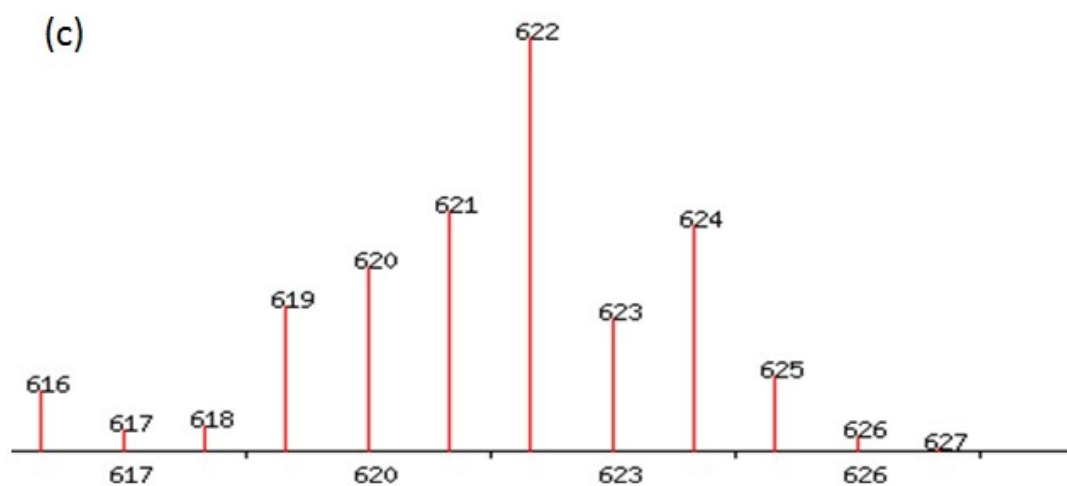

Figure S13.

(a) ESI-MS of the reaction mixture using complex **12**  $[\text{Ru}(\text{CNC}_{\text{Bn}})(\text{CO})_2(\text{H})]^+$  as catalyst and  $\text{KO}^t\text{Bu}$  as the alkali metal salt under catalytic hydroboration conditions.

(b) experimental isotopic distribution pattern of  $[\text{Ru}(\text{CNC}_{\text{Bn}})(\text{CO})_2(\text{OCOH})]^+$

(c) predicted isotopic distribution for  $[\text{Ru}(\text{CNC}_{\text{Bn}})(\text{CO})_2(\text{OCOH})]^+$

## S6. NMR Spectra of synthesized compounds

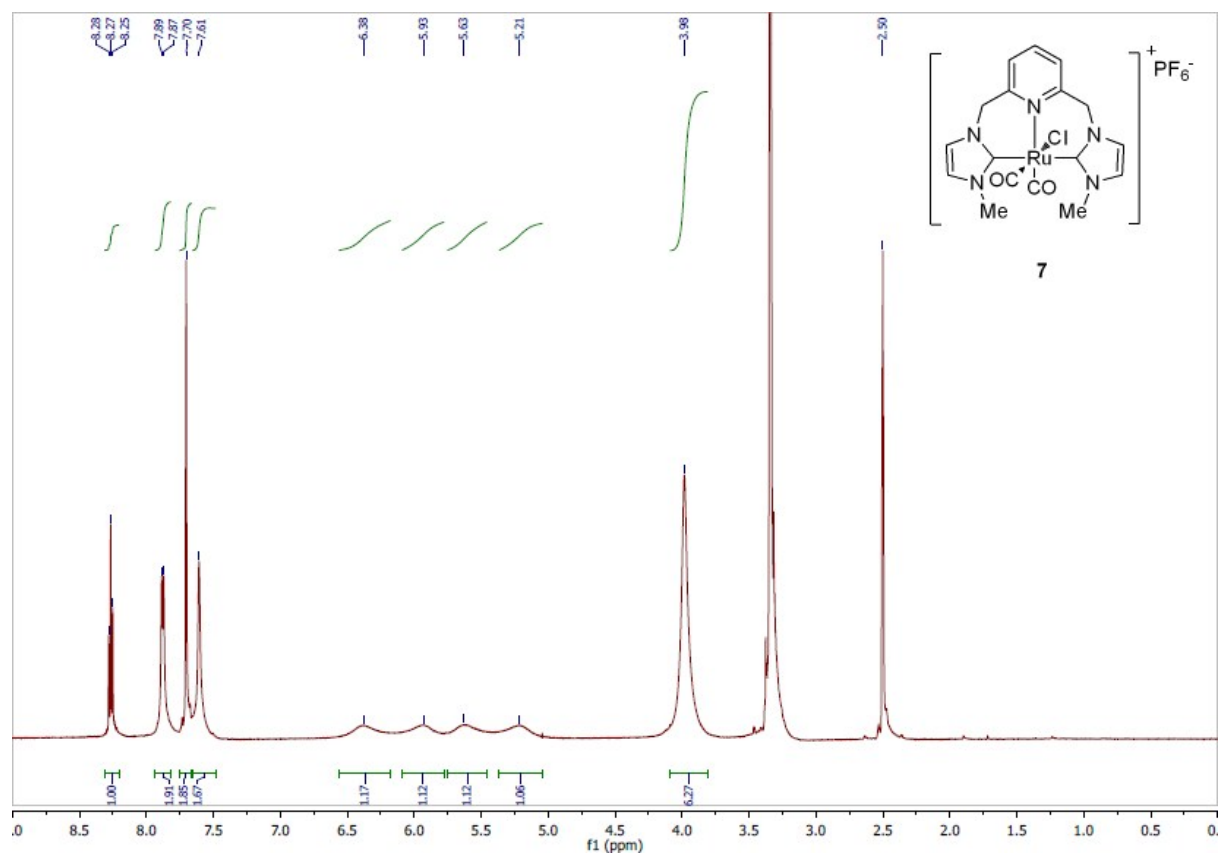

Figure S14.  $^1\text{H}$  NMR spectrum of **7** in  $\text{DMSO-}d_6$

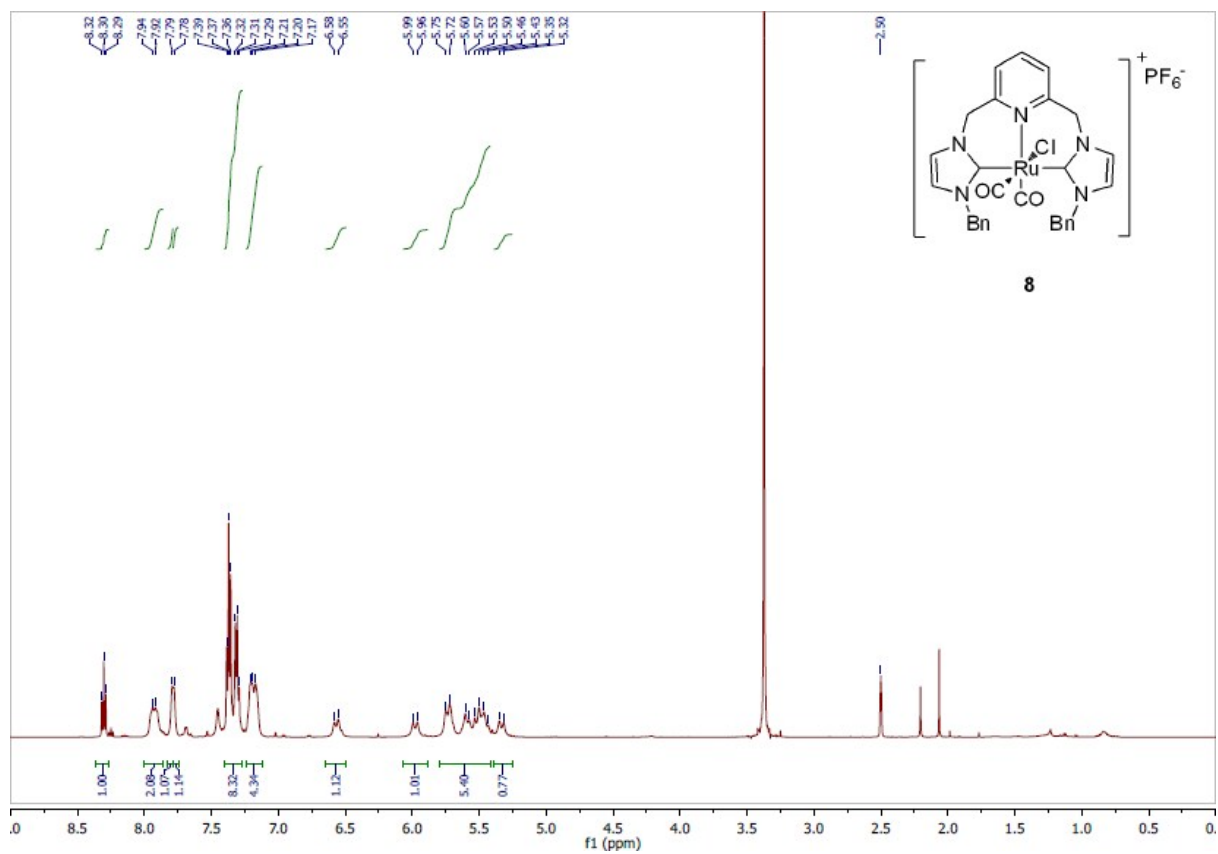

Figure S15.  $^1\text{H}$  NMR spectrum of **8** in  $\text{DMSO-}d_6$





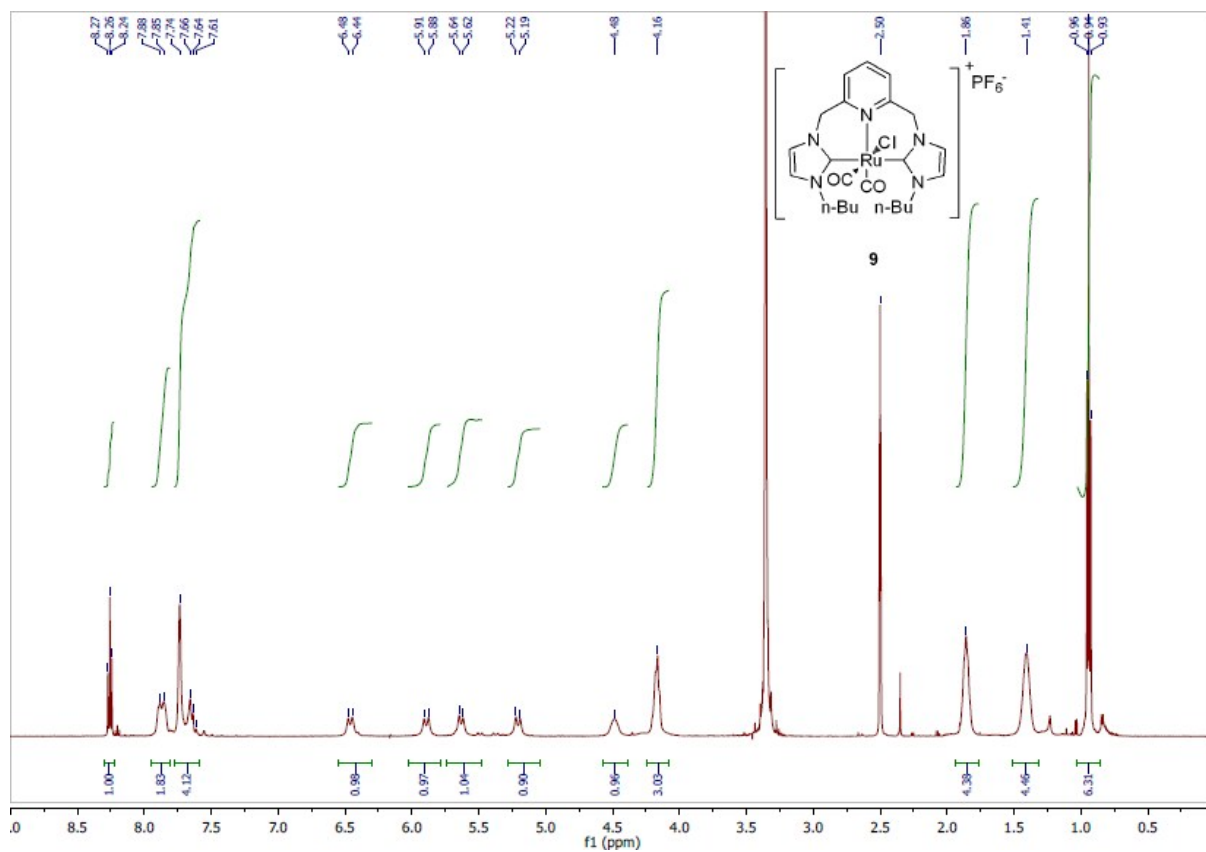

Figure S17. <sup>1</sup>H NMR spectrum of **9** in DMSO-*d*<sub>6</sub>

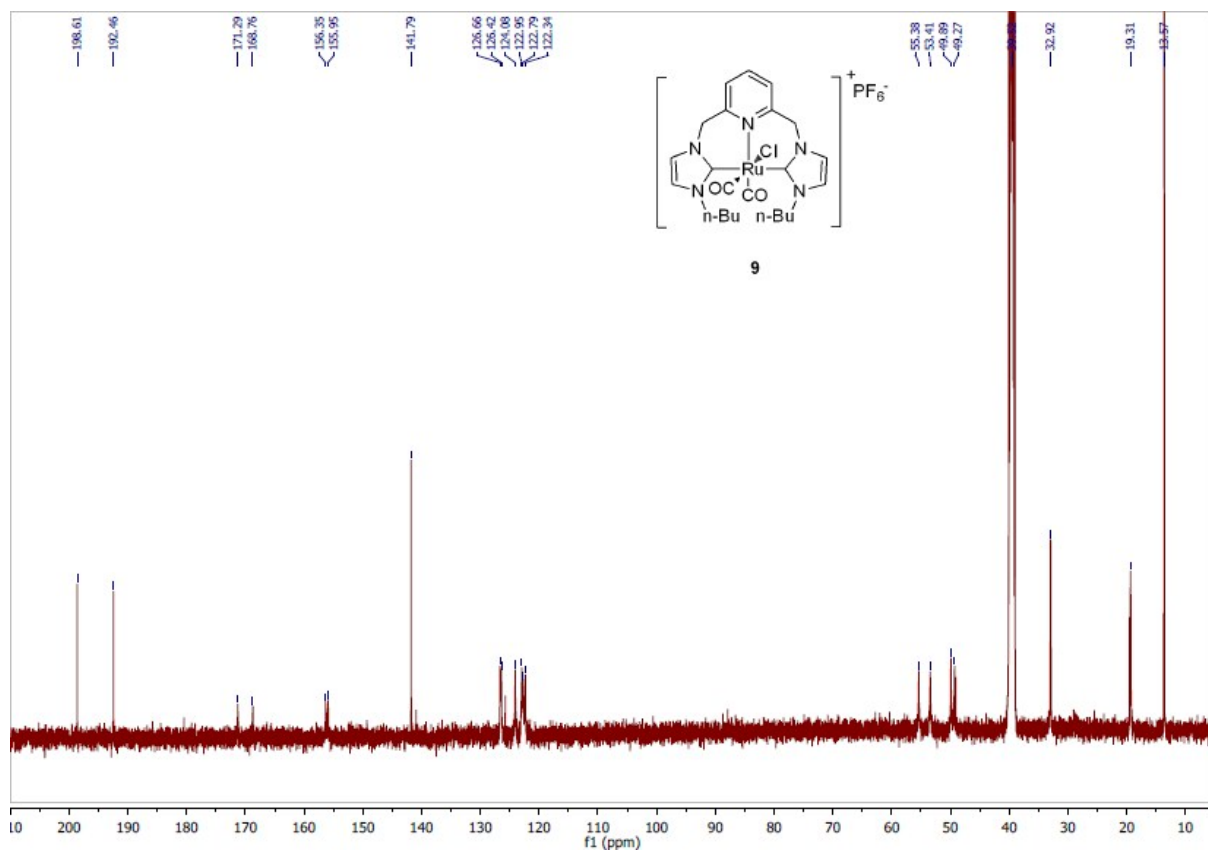

Figure S18. <sup>13</sup>C NMR spectrum of **9** in DMSO-*d*<sub>6</sub>

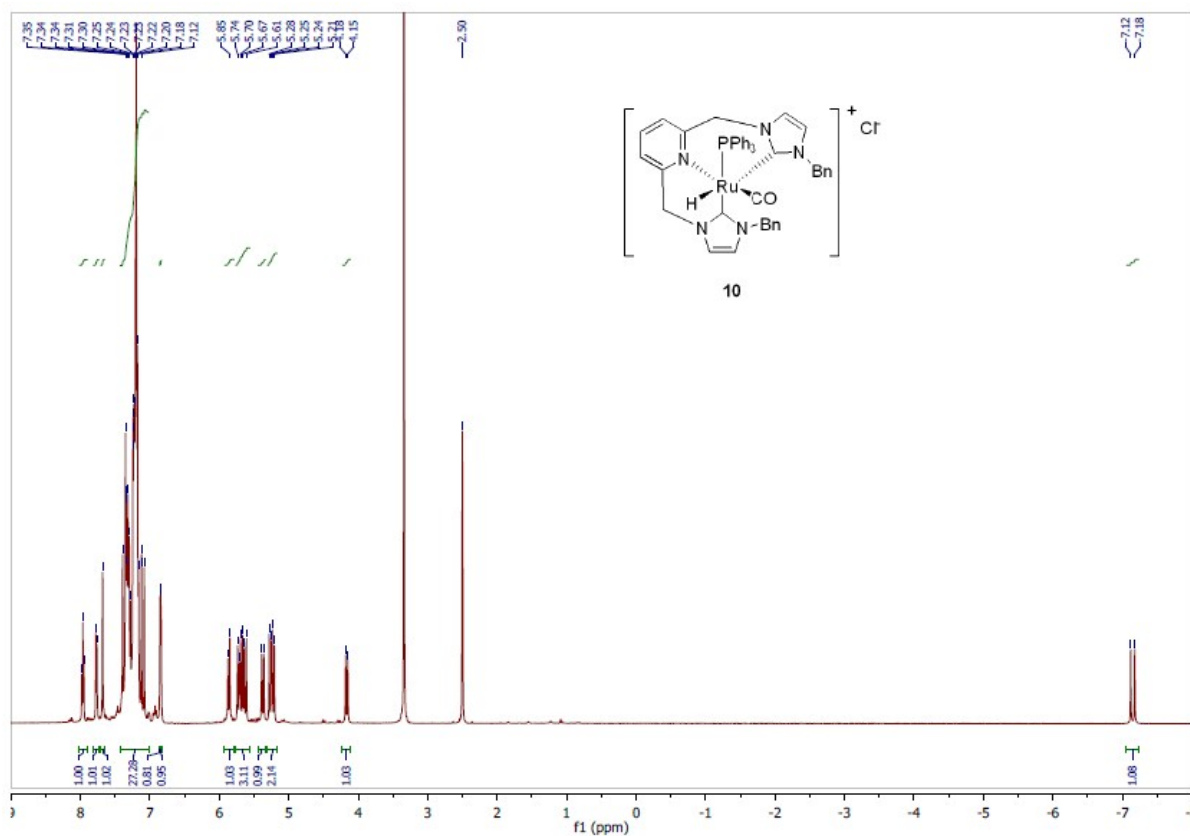

Figure S19.  $^1\text{H}$  NMR spectrum of **10** in  $\text{DMSO-}d_6$

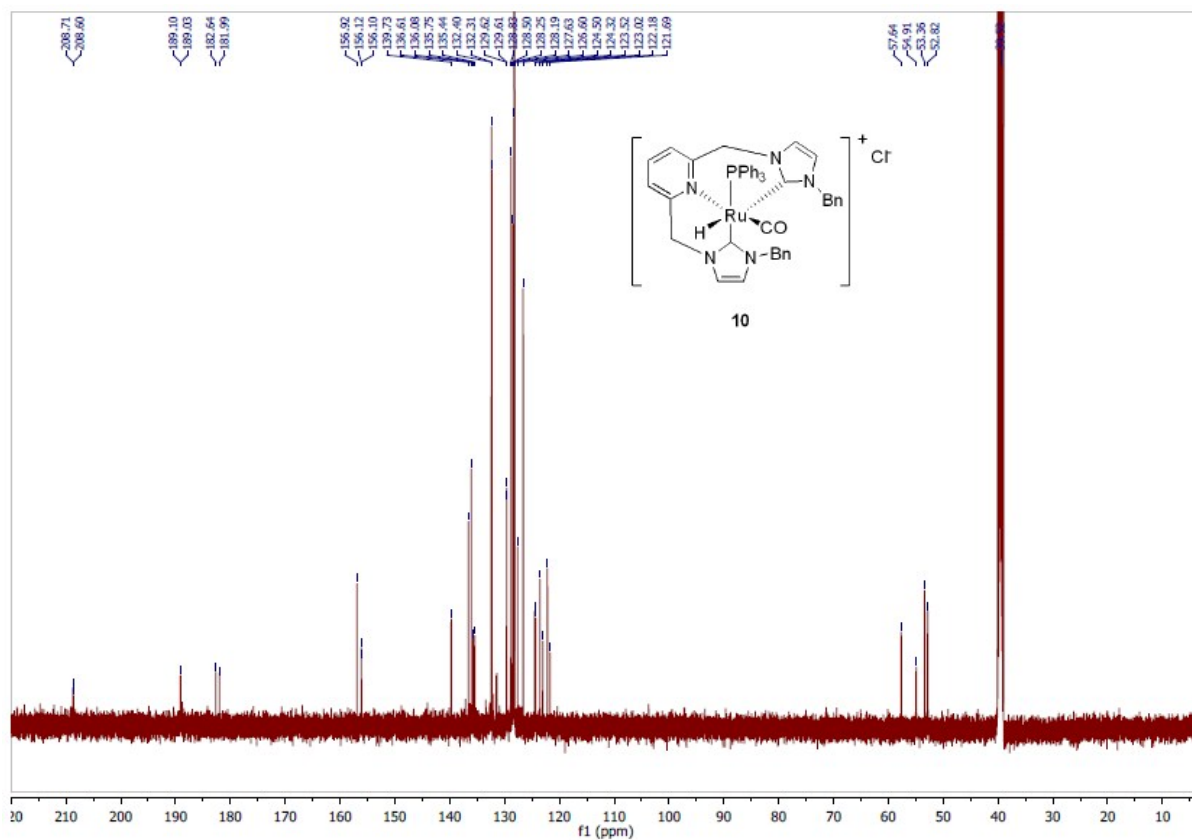

Figure S20. <sup>13</sup>C NMR spectrum of **10** in DMSO-*d*<sub>6</sub>

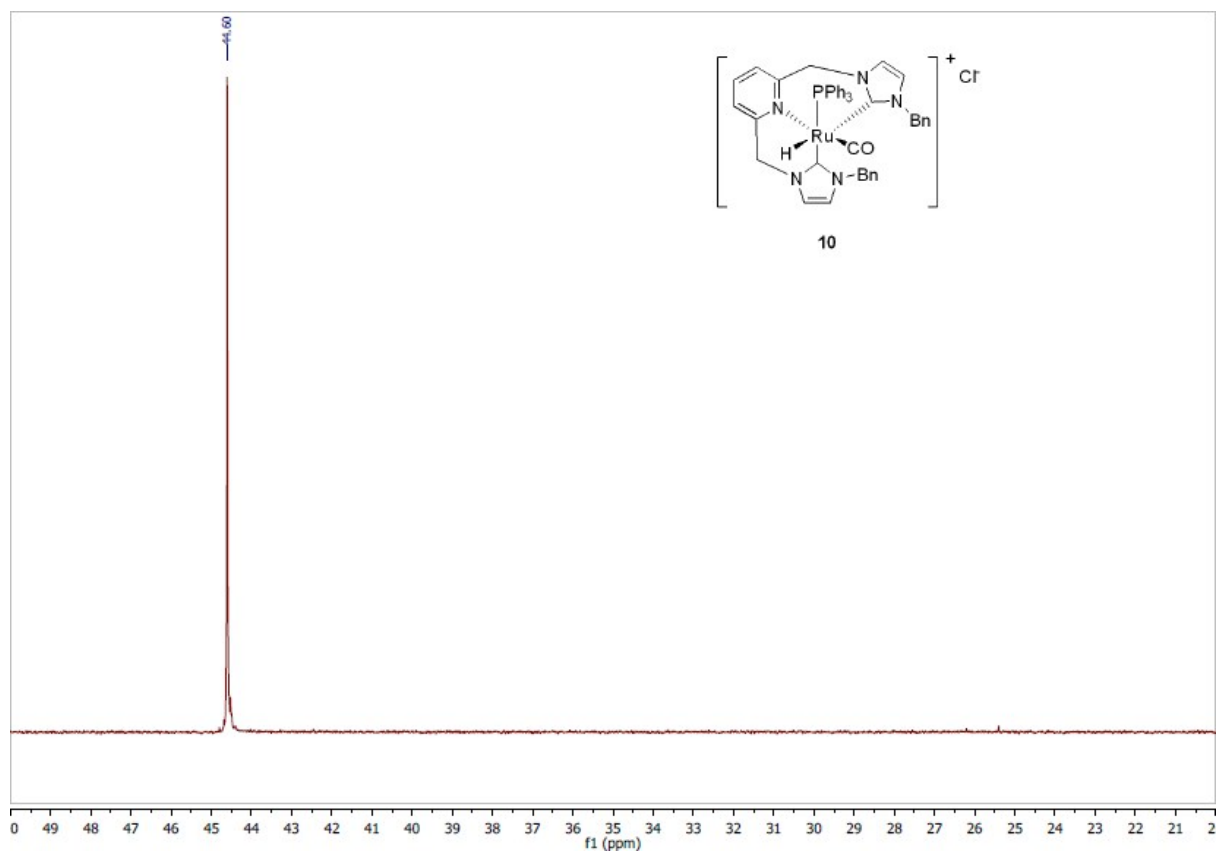

Figure S21.  $^{31}\text{P}$  NMR spectrum of **10** in  $\text{DMSO-}d_6$

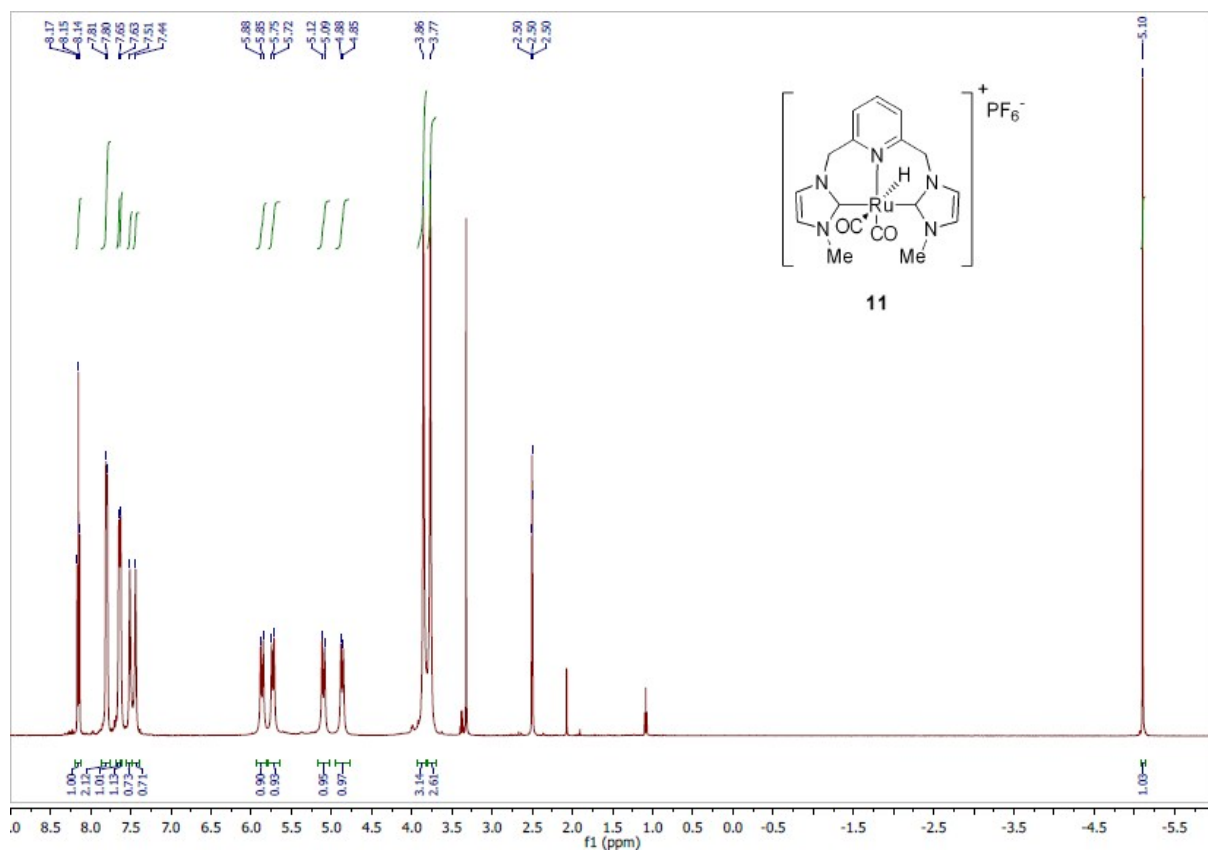

Figure S22.  $^1\text{H}$  NMR spectrum of **11** in  $\text{DMSO-}d_6$

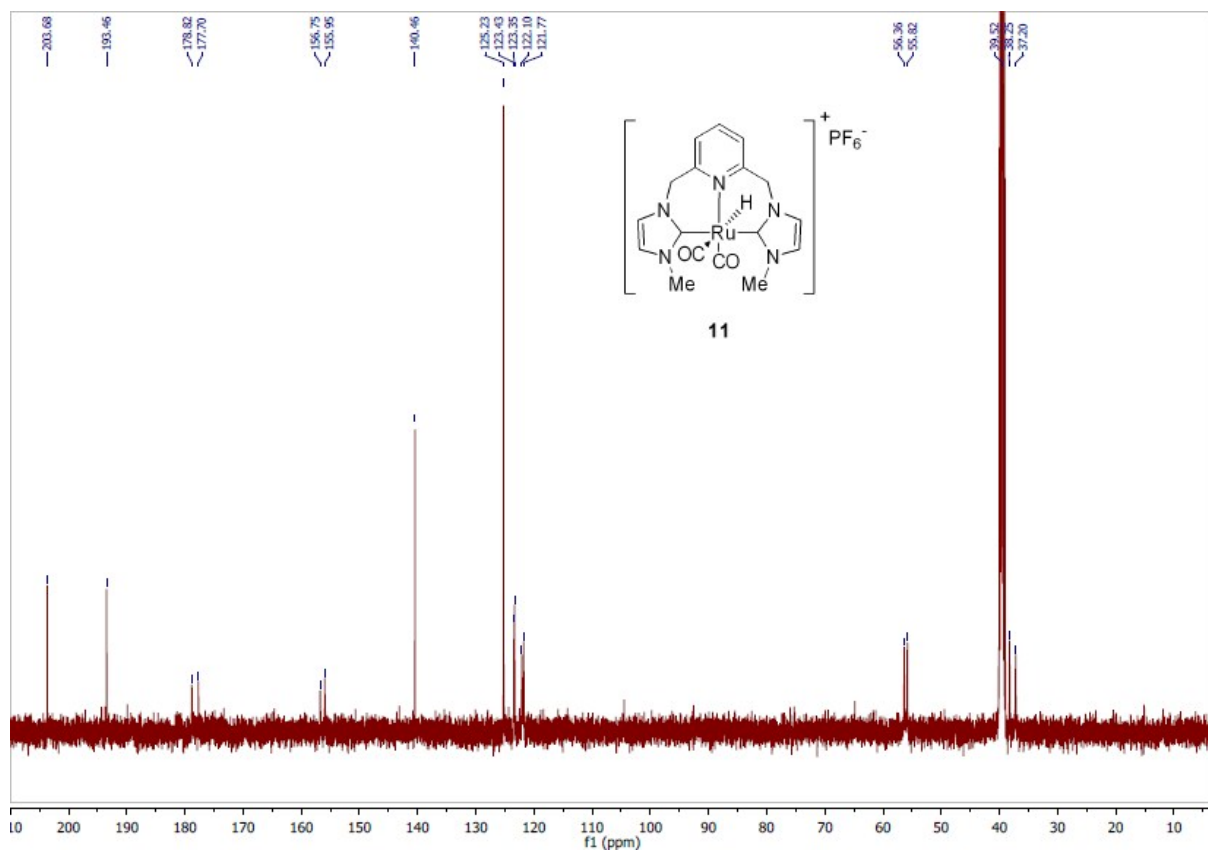

Figure S23.  $^{13}\text{C}$  NMR spectrum of **11** in  $\text{DMSO-}d_6$

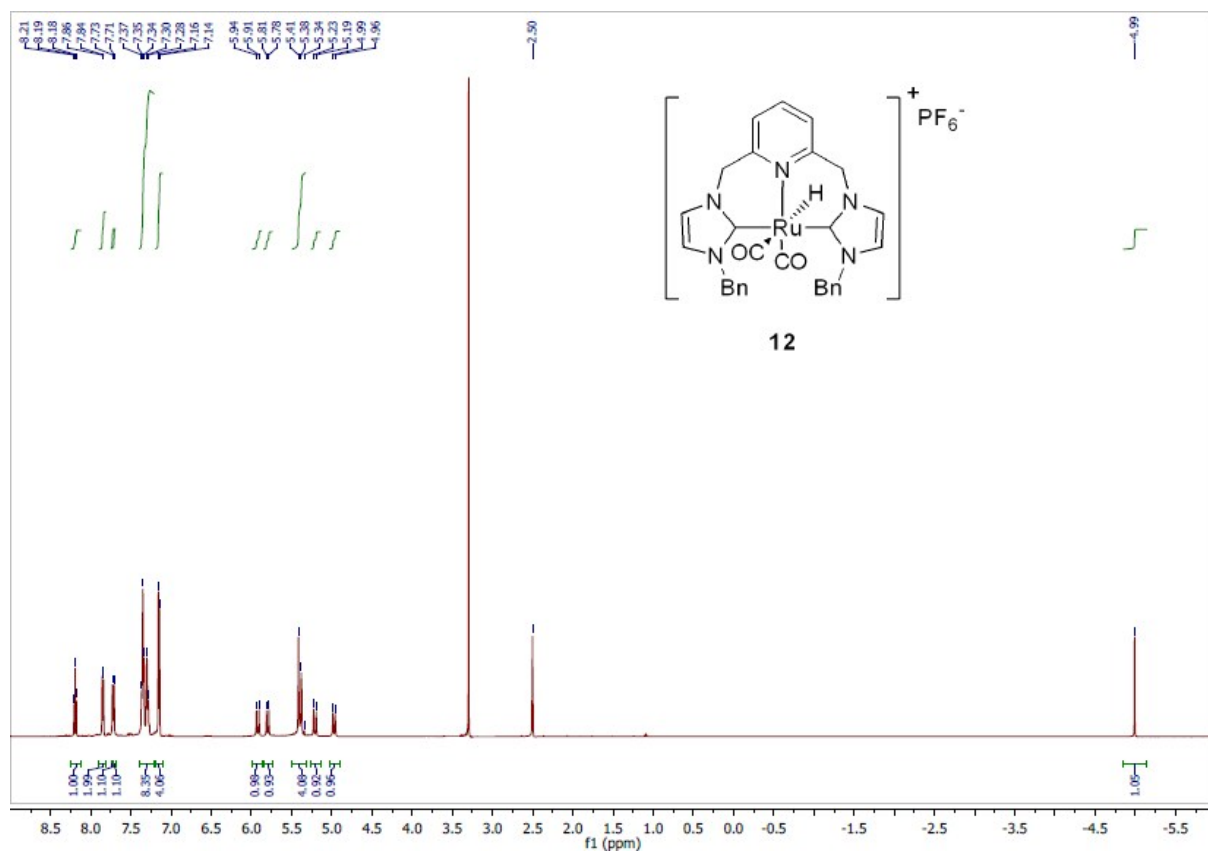

Figure S24.  $^1\text{H}$  NMR spectrum of **12** in  $\text{DMSO-}d_6$



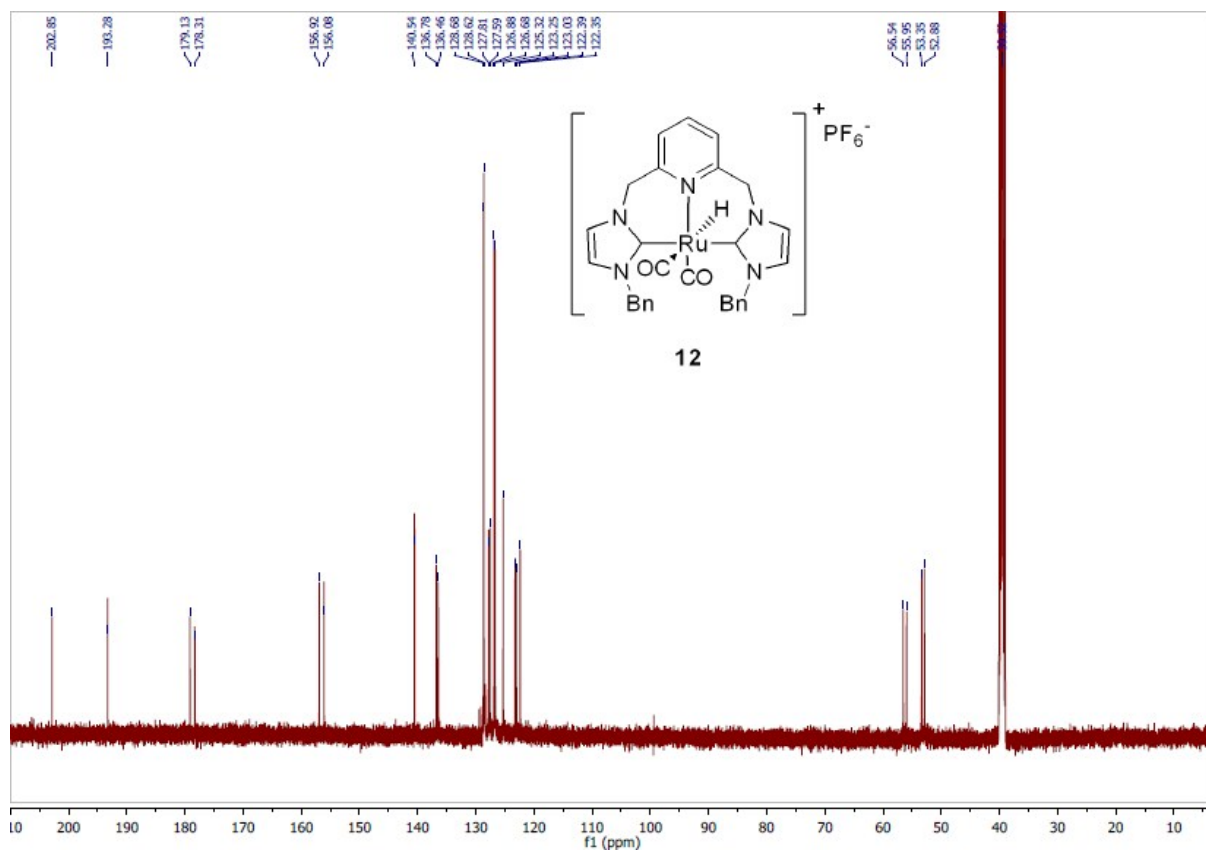

Figure S25.  $^{13}\text{C}$  NMR spectrum of **12** in  $\text{DMSO-}d_6$

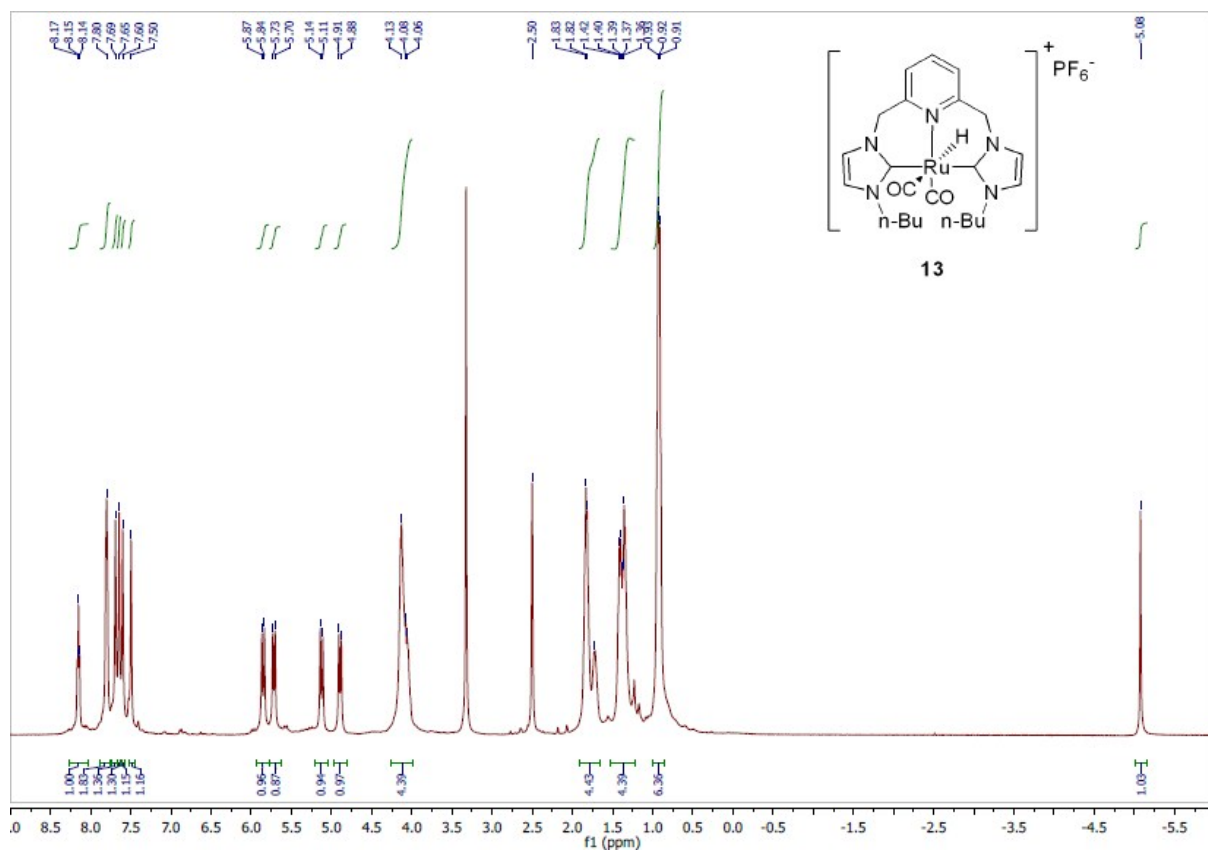

Figure S26.  $^1\text{H}$  NMR spectrum of **13** in  $\text{DMSO-}d_6$

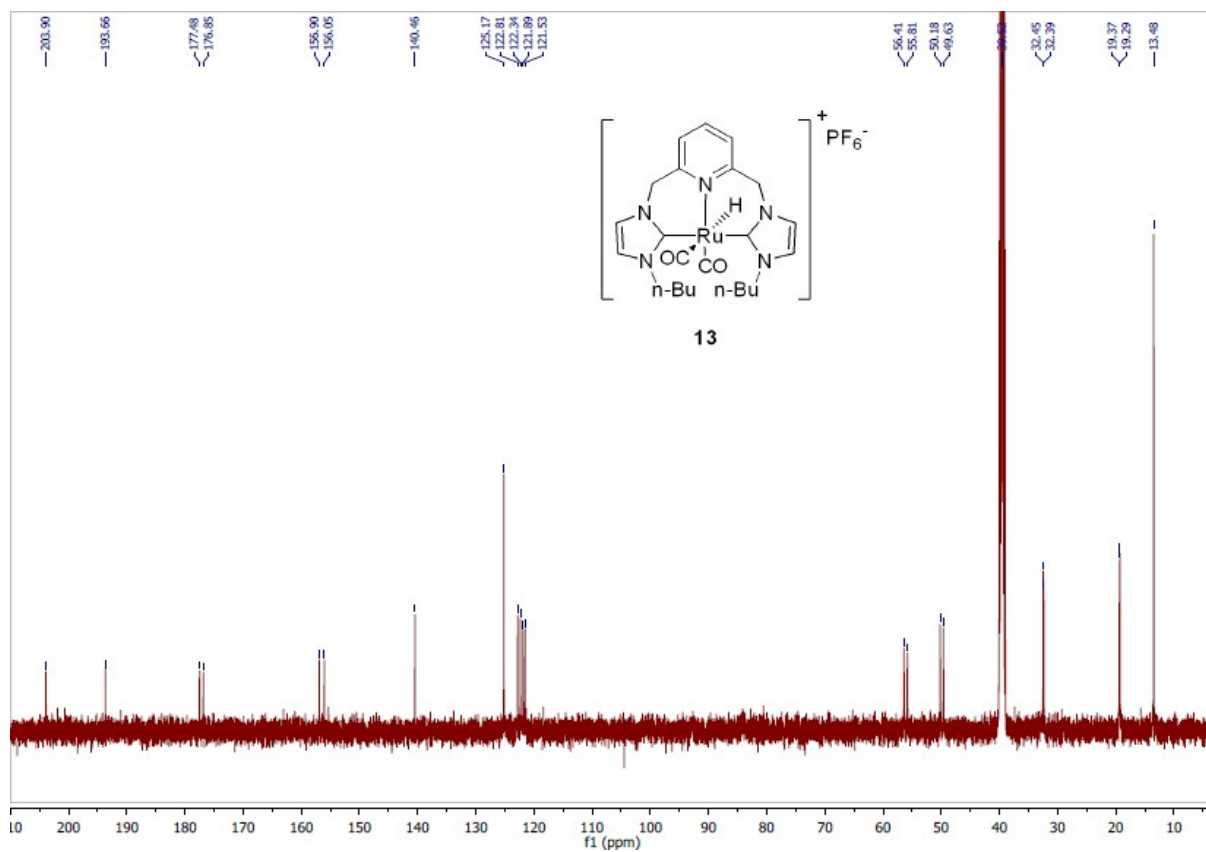

Figure S27. <sup>13</sup>C NMR spectrum of **13** in DMSO-*d*<sub>6</sub>

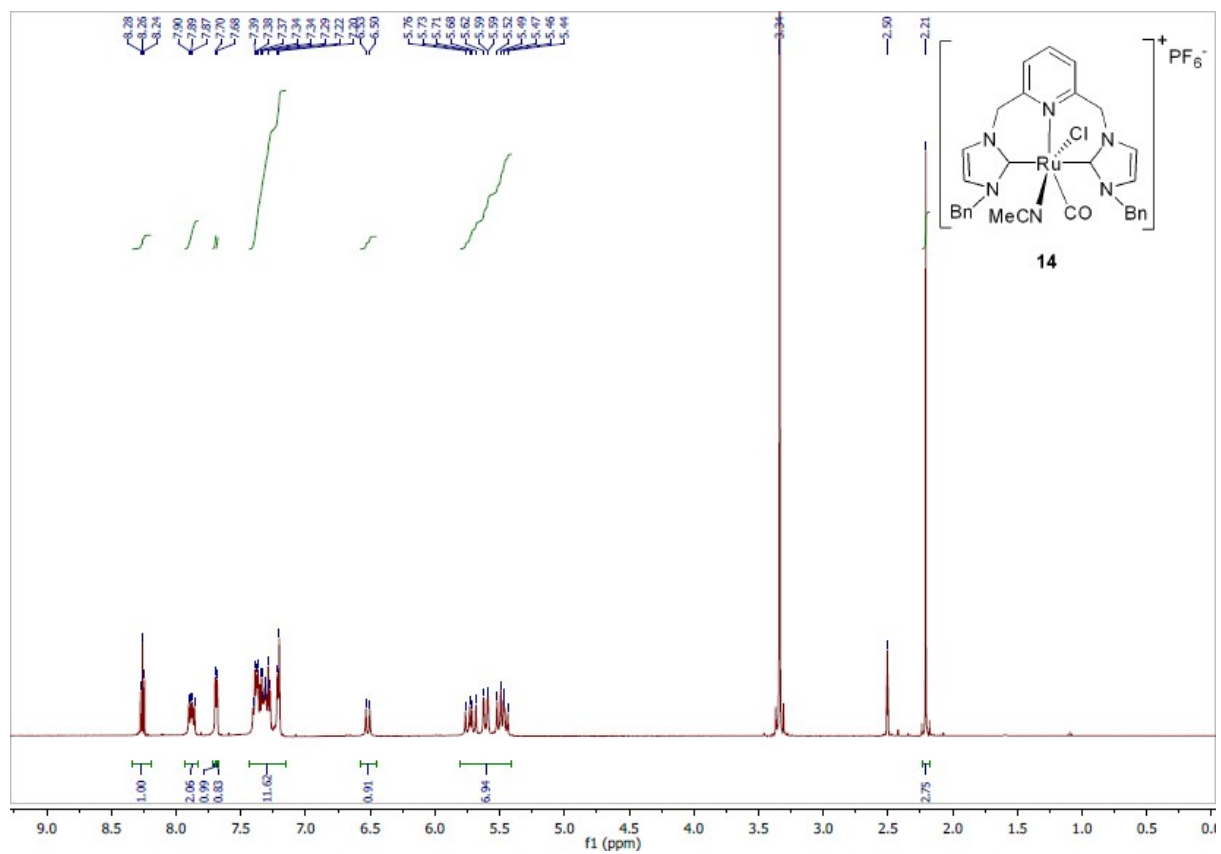

Figure S28.  $^1\text{H}$  NMR spectrum of **14** in  $\text{DMSO-}d_6$

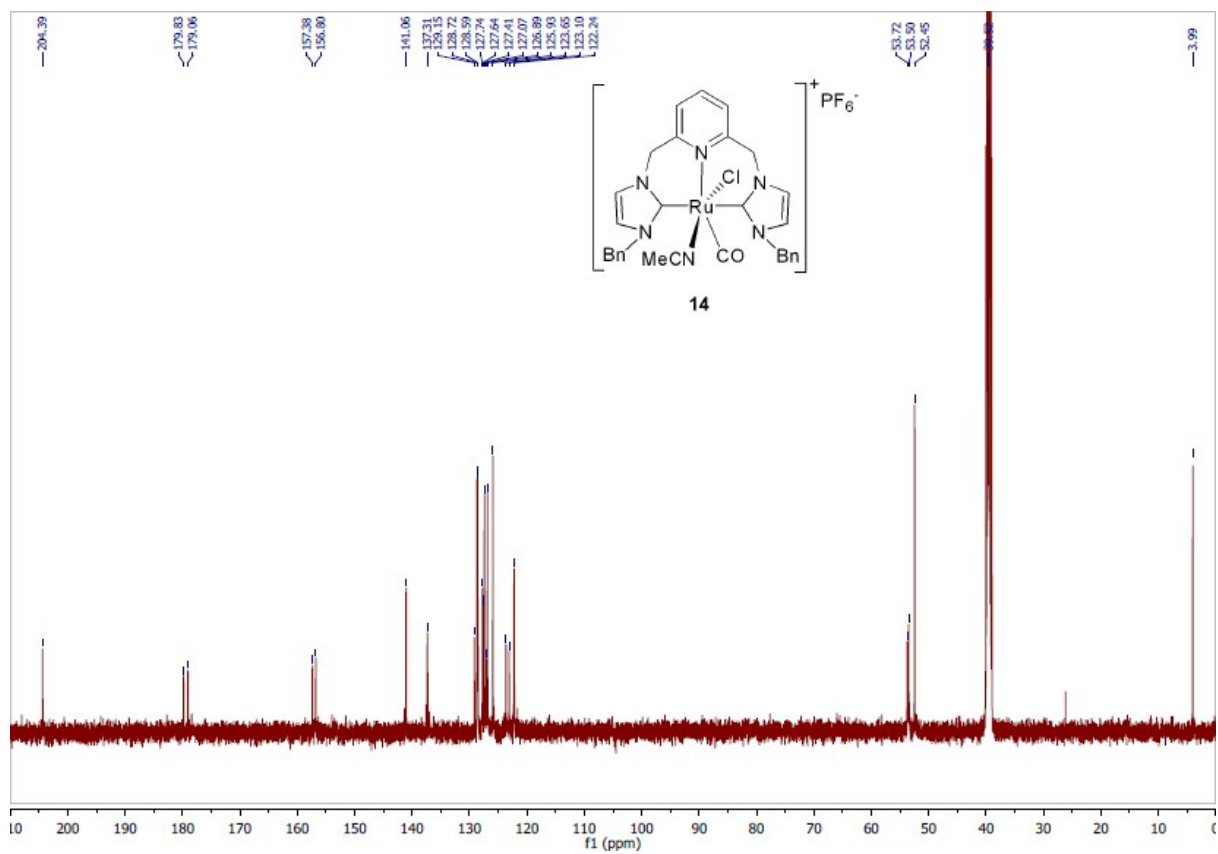

Figure S29.  $^{13}\text{C}$  NMR spectrum of **14** in  $\text{DMSO-}d_6$

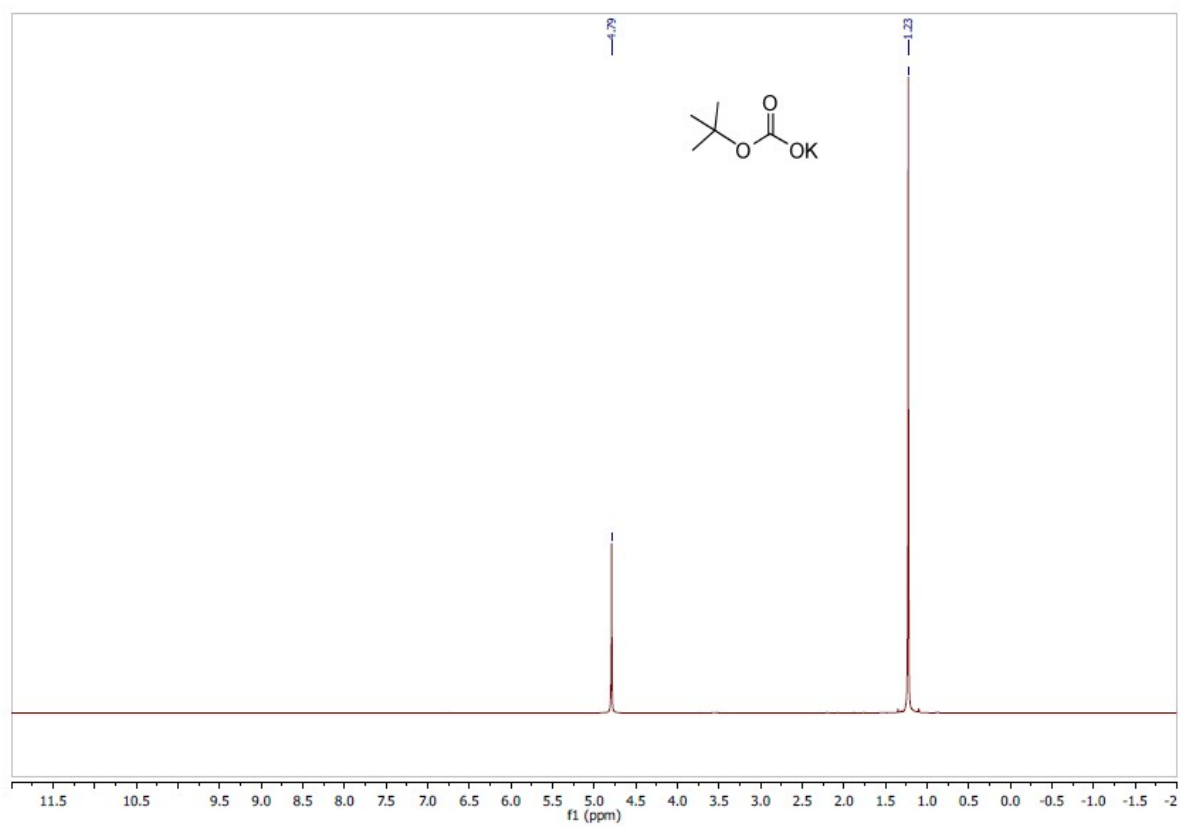

Figure S30.  $^1\text{H}$  NMR spectrum of  $\text{KOCOC}_2\text{tBu}$  in  $\text{D}_2\text{O}$

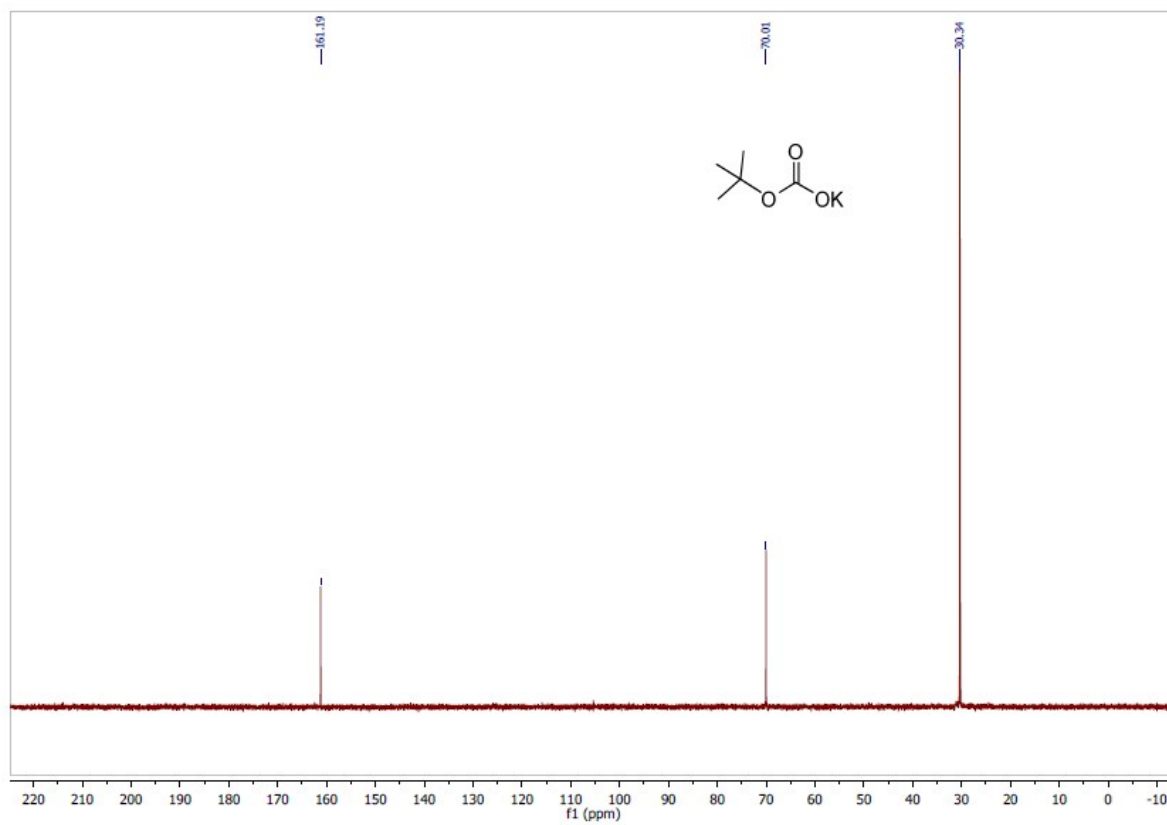

Figure S31.  $^{13}\text{C}$  NMR spectrum of  $\text{KOCO}_2\text{tBu}$  in  $\text{D}_2\text{O}$

## References:

1. (a) S. Gründemann, M. Albrecht, J. A. Loch, J. W. Faller and R. H. Crabtree, *Organometallics*, 2001, **20**, 5485-5488; (b) R. S. Simons, P. Custer, C. A. Tessier and W. J. Youngs, *Organometallics*, 2003, **22**, 1979-1982; (c) Y. Zhang, K. C. Ngeow and J. Y. Ying, *Organic Letters*, 2007, **9**, 3495-3498
2. D. J. Nielsen, K. J. Cavell, B. W. Skelton and A. H. White, *Inorganica Chimica Acta*, 2002, **327**, 116-125
3. M. Hernandez-Juarez, M. Vaquero, E. Alvarez, V. Salazar and A. Suarez, *Dalton Transactions*, 2013, **42**, 351-354
4. D. Mulhern, Y. Lan, S. Brooker, J. F. Gallagher, H. Görls, S. Rau and J. G. Vos, *Inorganica Chimica Acta*, 2006, **359**, 736-744
5. N. Ahmad, J. J. Levison, S. D. Robinson, M. F. Uttley, E. R. Wonchoba and G. W. Parshall, in *Inorganic Syntheses*, John Wiley & Sons, Inc., 2007, DOI: 10.1002/9780470132463.ch13, pp. 45-64.
6. N. Walker and D. Stuart, *Acta Crystallographica Section A*, 1983, **39**, 158-166
7. G. Sheldrick, *Acta Crystallographica Section A*, 2015, **71**, 3-8
8. G. Sheldrick, *Acta Crystallographica Section A*, 2008, **64**, 112-122
9. G. Sheldrick, *Acta Crystallographica Section C*, 2015, **71**, 3-8
10. A. G. Orpen, *Journal of the Chemical Society, Dalton Transactions*, 1980, DOI: 10.1039/DT9800002509, 2509-2516
11. (a) B. M. Pope, Y. Yamamoto and D. S. Tarbell, *Org. Synth.*, 1977, **57**, 45; (b) E. E. Coyle, B. J. Doonan, A. J. Holohan, K. A. Walsh, F. Lavigne, E. H. Krenske and C. J. O'Brien, *Angewandte Chemie International Edition*, 2014, **53**, 12907-12911
12. T. Bolaño, M. A. Esteruelas, M. P. Gay, E. Oñate, I. M. Pastor and M. Yus, *Organometallics*, 2015, **34**, 3902-3908
